# Supplementary material for: A cooperative nanoscale ZnO–NiO–Ni heterojunction for sustainable catalytic amidation of aldehydes with secondary amines
Source: Royal Society of Chemistry journal article supplement (doi:10.1039/d4su00304g), 2024-01-01
Supplement: d4su00304g1.pdf [file d4su00304g1.pdf]

# Supporting Information

## Cooperative Nanoscale ZnO-NiO-Ni Heterojunction for Sustainable Catalytic Amidation of Aldehydes with Secondary Amines

Amishwar Raysing Shelte <sup>a, b</sup> Rahul Daga Patil <sup>a, b</sup> Sanjay Pratihari <sup>a, b\*</sup>

<sup>a</sup>Inorganic Materials and Catalysis Division, CSIR–Central Salt & Marine Chemicals

Research Institute, Gijubhai Badheka Marg, Bhavnagar, Gujarat 364002, India

<sup>d</sup>Academy of Scientific and Innovative Research (AcSIR), Ghaziabad, Uttar Pradesh 201002,  
India

E-mail: [spratihari@csmcri.res.in](mailto:spratihari@csmcri.res.in) or [spratihari29@gmail.com](mailto:spratihari29@gmail.com)

## Table of Content

| <b>Section No.</b> | <b>Title</b>                                                                                                                     | <b>Page No.</b> |
|--------------------|----------------------------------------------------------------------------------------------------------------------------------|-----------------|
| <b>1</b>           | <b>Experimental Methods</b>                                                                                                      | <b>2</b>        |
| 1.1                | Materials and Method                                                                                                             | 2               |
| <b>2</b>           | <b>Synthesis of materials</b>                                                                                                    | <b>3-4</b>      |
| 2.1                | General procedure for the synthesis of materials                                                                                 | 3               |
| 2.2                | Method of pyrolysis for <b>ZN-O</b> and <b>ZN-R</b> catalyst.                                                                    | 4               |
| 2.3                | Method of pyrolysis for ZN-O and ZN-R was directed under diverse atmospheric conditions                                          | 4               |
| <b>3</b>           | <b>General Procedure for Oxidative Coupling of Benzaldehyde and Amine to Synthesize Amide</b>                                    | <b>5</b>        |
| <b>4</b>           | <b><math>^1\text{H}</math> and <math>^{13}\text{C}</math> NMR data of products</b>                                               | <b>5-7</b>      |
| <b>5</b>           | <b><math>^1\text{H}</math> and <math>^{13}\text{C}</math> NMR spectra of products</b>                                            | <b>8-19</b>     |
| <b>6</b>           | <b>Synthesis and Characterization of Benzoate Side Product in the Oxidative Coupling of Benzaldehyde and Amine to Form Amide</b> | <b>19-20</b>    |
| 6.1                | Procedure for the synthesis of benzoate                                                                                          | 19              |
| 6.2                | $^1\text{H}$ and $^{13}\text{C}$ NMR Spectra of benzoate                                                                         | <b>20</b>       |
| <b>7</b>           | <b>Reusability Study</b>                                                                                                         | <b>21-23</b>    |
| <b>8</b>           | <b>CHEM21 green matric toolkit</b>                                                                                               | <b>24-33</b>    |
| <b>9</b>           | <b>References</b>                                                                                                                | <b>34</b>       |

## 1. Experimental Section

---

### 1.1 Materials and Method

Commercially sourced solvents were used for material synthesis and catalytic reactions without further purification. The reagents used in the studies were commercially available and used as received. To optimize reactions and examine substrate scope in oxidation reactions, studies were carried out in a pressure tube attached to a reaction station, which maintained a dry, oxygen-free environment. PXRD analysis was performed using a Philips X'pert X-ray powder diffractometer with Cu K $\alpha$  radiation ( $\lambda = 1.54178 \text{ \AA}$ ). The JEOL JSM 7100F microscope was used to generate high-resolution scanning electron microscopy (HR-SEM) pictures. To avoid charging, samples were coated with a thin layer of gold via sputtering before imaging. For HR-SEM examination, materials were ultrasonically dispersed in a methanol-acetone mixture for 30 minutes before being deposited onto aluminum stubs with a micropipette. After the solvent had completely evaporated, the samples were dried in a vacuum desiccator for 12 hours. Thermo-Scientific's NEXSA device was used to perform X-ray photoelectron spectroscopy (XPS). The analyzer was calibrated to 284.8 eV for the binding energy of the C1s peak, and the pass energy was held constant at 20 eV. An electron flood cannon with low energy was used to reduce sample charging. Data was processed using the CasaXps program. Samples were placed on 300-mesh carbon-coated copper grids, and JEOL JEM-2100 high-resolution transmission electron microscopy (HR-TEM) pictures were obtained. Following 30 minutes of sonication to disperse the samples in ethanol, capillary action was used to deposit the samples onto copper grids. For two hours, grids were vacuum-dried in a desiccator. To perform the GC-MS analysis, the Shimadzu GCMS QP 2020 system was employed. The Perkin Elmer Optima 2000 apparatus was used to perform inductively coupled plasma (ICP) analysis. Each sample was prepared by mixing it with aqua regia (HCl: HNO<sub>3</sub> = 3:1) and letting it evaporate on a hot plate until it was completely dry, which allowed the metals to dissolve. This was done three

times, evaporating and dissolving. To digest the residual material for ICP-MS analysis, it was dissolved in strong nitric acid, heated to eliminate extra nitric acid, and then diluted nitric acid was used. The content of zinc and nickel was determined by doing three consecutive ICP-MS tests on each sample at three distinct concentrations.

## **2. Synthesis of Materials**

---

### **2.1 General Procedure for Synthesis of Materials**

The materials used in this study have already been synthesized and reported by us.<sup>1, 2</sup> Zinc acetate sodium acetate [ $\text{CH}_3\text{COONa}$ ] (1.6 g, 20 mmol) and [ $\text{Zn}(\text{OAc})_2 \cdot \text{H}_2\text{O}$ ] (2.2 g, 10 mM) in methanol (30 mL) at ambient temperature for an hour was the first step in the synthesis of **ZN-O**. An additional hour of stirring at ambient temperature was then required after adding 1.5 g (10 mmol) of nickel sulfate [ $\text{NiSO}_4 \cdot 6\text{H}_2\text{O}$ ] to the reaction mixture. After completing the first stage, a solution containing 2 mL of 42 mM hydrazine hydrate was added, and the resulting mixture was heated for 4 hours at 90 °C with reflux in an oil bath. Subsequently, the reaction mixture was moved into a 150 mL steel jar lined with Teflon, sealed firmly, and heated under autogenous pressure for 12 hours at 130 °C. Centrifugation was used to extract the final product once the reaction was finished and the steel vessel was cool. A white substance (**ZN-O**, 1.5 g) was obtained from the collected material when it was repeatedly washed with methanol and water and dried in an oven heated at 60 °C for 12 hours. Using a solution of methanol (10 mL) containing sodium borohydride ( $\text{NaBH}_4$ , 5 mM, 190 mg), a dropwise addition of **ZN-O** (0.3 g) in methanol (30 mL) at 25 °C produced **ZN-R**. Under an argon environment, the addition was carried out gradually and carefully. The same temperature was kept for four hours throughout the reaction. Following the completion of the reaction, the resulting black material was separated by centrifugation and subsequently cleaned with methanol and water. The final product was obtained by vacuum-drying the solid black material (**ZN-R**).

**2.2 Method of Pyrolysis for ZN-O and ZN-R Catalyst:** After completing the previous procedure, the (ZN-O/ZN-R) solid materials were transferred to a crucible and then put inside a furnace for pyrolysis. Employing a temperature gradient of 80 °C per minute, the pyrolysis process was carried out for three hours in standard air conditions. The materials were assigned sample codes based on the specific pyrolysis conditions and their initial composition (ZN-O/ZN-R). ZN-O-6 and ZN-R-6 were the labels utilized for the products of pyrolysis at 600 °C.

**2.3 Method of Pyrolysis for ZN-O and ZN-R was directed under diverse atmospheric conditions.** With a temperature gradient of 5 °C every minute, the pyrolysis process included changing the atmosphere's pressure and temperatures. Throughout the whole pyrolysis process, a constant argon gas combination was maintained. The (ZN-O/ZN-R) parent material, the temperature at which pyrolysis took place, and the particular environment used were used to categorize the materials. For the materials, the following sample codes were assigned: ZN-O-A-7 (pyrolyzed in an argon environment at 700°C).

### **3. General Procedure for Oxidative Coupling of Benzaldehyde and Amine to Synthesize Amide**

---

The reaction was conducted in a pressure tube equipped with simultaneous heating/cooling, stirring, and refluxing capabilities under an inert atmosphere using the Carousel 12 Plus reaction station. A dry and oxygen-free argon/nitrogen atmosphere was maintained throughout the process. In the reaction vessel, 0.5 mM of substituted benzaldehyde derivatives and 0.5 mM of secondary amine (morpholine, thiomorpholine, piperazine, pyrrolidine, piperidine, etc) were combined with 5-6 M TBHP in dodecane (112 µL, approximately 0.5 mM) and ZN-O-A-7

catalyst (7.1 mol%, 10 mg) dissolved in 3 mL of THF. The mixture was then refluxed at 90°C for 2 hours. Upon completion of the reaction, the solid catalyst was separated *via* centrifugation. The THF solvent was evaporated, and 50 mL of water was added. The resulting mixture was extracted with ethyl acetate (50 mL  $\times$  3), followed by washing with water (50 mL  $\times$  2) and brine (50 mL  $\times$  1). The organic phase was dried over anhydrous Na<sub>2</sub>SO<sub>4</sub> (5 g). After solvent removal under reduced pressure, the crude product was subjected to gas chromatography-mass spectrometry (GC-MS) analysis. The pure product was isolated via column chromatography using hexane: ethyl acetate as the eluent. The isolated product was characterized using <sup>1</sup>H and <sup>13</sup>C NMR spectroscopy.

#### 4. <sup>1</sup>H and <sup>13</sup>C NMR data of products

|                                                                                                 |                                                                                                                                                                                                                                                                                                                                  |
|-------------------------------------------------------------------------------------------------|----------------------------------------------------------------------------------------------------------------------------------------------------------------------------------------------------------------------------------------------------------------------------------------------------------------------------------|
| 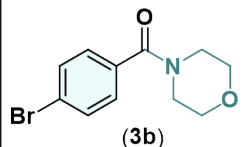 <p>(3b)</p> | <p>(4-bromophenyl)(morpholino)methanone (<b>3b</b>): <sup>1</sup>H NMR (600 MHz, CDCl<sub>3</sub>) δ 7.53 (d, J = 8.4 Hz, 2H), 7.26 (d, J = 8.4 Hz, 2H), 3.75 – 3.70 (m, 4H), 3.60 (d, J = 5.8 Hz, 2H), 3.45 – 3.37 (m, 2H). <sup>13</sup>C NMR (151 MHz, CDCl<sub>3</sub>) δ 169.6, 134.1, 131.9, 128.9, 124.4, 66.9, 29.8.</p> |
|  <p>(3c)</p> | <p>(4-chlorophenyl)(morpholino)methanone (<b>3c</b>): <sup>1</sup>H NMR (600 MHz, CDCl<sub>3</sub>) δ 7.37 (d, J = 8.0 Hz, 2H), 7.33 (d, J = 7.9 Hz, 2H), 3.81 – 3.66 (m, 4H), 3.61 – 3.57 (m, 2H), 3.44 – 3.37 (m, 2H). <sup>13</sup>C NMR (151 MHz, CDCl<sub>3</sub>) δ 169.5, 136.1, 133.7, 128.9, 128.8, 66.9, 29.8.</p>     |
|  <p>(3e)</p> | <p>morpholino(4-nitrophenyl)methanone (<b>3e</b>): <sup>1</sup>H NMR (600 MHz, CDCl<sub>3</sub>) δ 8.29 (d, J = 8.6 Hz, 2H), 7.59 (d, J = 8.6 Hz, 2H), 3.86 – 3.75 (m, 4H), 3.69 – 3.59 (m, 2H), 3.47 – 3.30 (m, 2H). <sup>13</sup>C NMR (151 MHz, CDCl<sub>3</sub>) δ 169.5, 136.1, 133.7, 128.9, 128.8, 66.9, 29.8.</p>        |
|  <p>(4b)</p> | <p>(4-bromophenyl)(thiomorpholino)methanone (<b>4b</b>): <sup>1</sup>H NMR (600 MHz, CDCl<sub>3</sub>) δ 7.60 – 7.49 (m, 2H), 7.23 (dd, J = 8.4, 2.9 Hz, 2H), 3.97 (s, 2H), 3.63 (s, 2H), 2.68 (s, 2H), 2.55 (s, 2H). <sup>13</sup>C NMR (151 MHz, CDCl<sub>3</sub>) δ 169.5, 136.1, 133.7, 128.9, 128.8, 66.9, 29.8.</p>        |

CDCl<sub>3</sub>) δ 169.8, 134.6, 131.9, 128.6, 124.2, 50.2, 44.8.

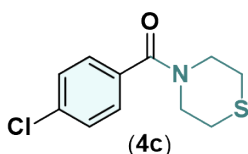

(4-chlorophenyl)(thiomorpholino)methanone (**4c**): <sup>1</sup>H NMR (600 MHz, CDCl<sub>3</sub>) δ 7.39 – 7.36 (m, 2H), 7.33 – 7.29 (m, 2H), 3.98 (s, 2H), 3.75 – 3.57 (m, 2H), 2.69 (s, 2H), 2.56 (s, 2H). <sup>13</sup>C NMR (151 MHz, CDCl<sub>3</sub>) δ 169.8, 136.0, 134.2, 129.0, 128.4, 29.8.

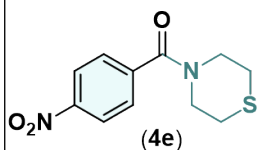

(4-nitrophenyl)(thiomorpholino)methanone (**4e**): <sup>1</sup>H NMR (600 MHz, CDCl<sub>3</sub>) δ 8.26 (d, J = 8.4 Hz, 2H), 7.53 (d, J = 8.2 Hz, 2H), 4.02 (s, 2H), 3.59 (s, 2H), 2.73 (s, 2H), 2.54 (s, 2H). <sup>13</sup>C NMR (151 MHz, CDCl<sub>3</sub>) δ 168.5, 148.5, 141.9, 127.9, 124.1, 50.1, 44.7, 28.1, 27.4.

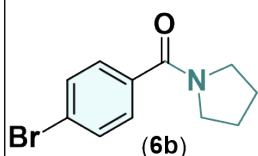

(4-bromophenyl)(pyrrolidin-1-yl)methanone (**6b**): <sup>1</sup>H NMR (600 MHz, CDCl<sub>3</sub>) δ 7.48 (d, J = 8.6 Hz, 2H), 7.35 (d, J = 8.5 Hz, 2H), 3.58 (t, J = 7.0 Hz, 2H), 3.36 (t, J = 6.7 Hz, 2H), 1.91 (p, J = 6.8 Hz, 2H), 1.83 (p, J = 6.8 Hz, 2H). <sup>13</sup>C NMR (151 MHz, CDCl<sub>3</sub>) δ 168.7, 136.0, 131.5, 128.9, 124.2, 49.7, 46.4, 26.5, 24.5.

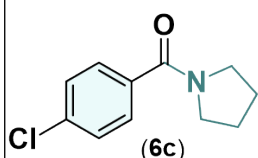

(4-chlorophenyl)(pyrrolidin-1-yl)methanone (**6c**): <sup>1</sup>H NMR (600 MHz, CDCl<sub>3</sub>) δ 7.44 (d, J = 8.5 Hz, 2H), 7.33 (d, J = 8.2 Hz, 2H), 3.60 (t, J = 7.1 Hz, 2H), 3.38 (t, J = 6.6 Hz, 2H), 1.92 (p, J = 6.8 Hz, 2H), 1.85 (p, J = 6.7 Hz, 2H). <sup>13</sup>C NMR (151 MHz, CDCl<sub>3</sub>) δ 168.7, 135.9, 135.5, 128.8, 128.6, 49.7, 46.4, 26.5, 24.5.

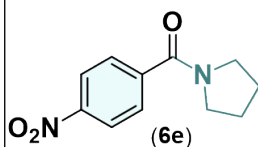

(4-nitrophenyl)(pyrrolidin-1-yl)methanone (**6e**): <sup>1</sup>H NMR (600 MHz, CDCl<sub>3</sub>) δ 8.26 (d, J = 8.2 Hz, 2H), 7.66 (d, J = 8.6 Hz, 2H), 3.66 (t, J = 7.1 Hz, 2H), 3.37 (t, J = 6.8 Hz, 2H), 1.98 (p, J = 6.9 Hz, 2H), 1.91 (p, J = 6.6 Hz, 2H). <sup>13</sup>C NMR (151 MHz, CDCl<sub>3</sub>) δ 167.5, 148.5, 143.2, 128.2, 123.8, 49.5, 46.5, 26.5, 24.4.

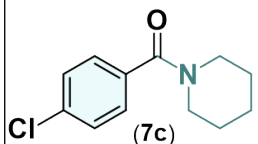

(4-chlorophenyl)(piperidin-1-yl)methanone (**7c**): <sup>1</sup>H NMR (600 MHz,

CDCl<sub>3</sub>)  $\delta$  7.34 (d,  $J$  = 8.3 Hz, 2H), 7.31 (d,  $J$  = 8.3 Hz, 2H), 3.67 (d,  $J$  = 8.2 Hz, 2H), 3.30 (d, 2H), 1.69 – 1.63 (m, 2H), 1.50 – 1.47 (m, 2H), 1.23 (t, 1H). <sup>13</sup>C NMR (151 MHz, CDCl<sub>3</sub>)  $\delta$  169.4, 135.5, 134.8, 131.4, 128.8, 48.9, 43.4, 29.8, 26.6, 24.6.

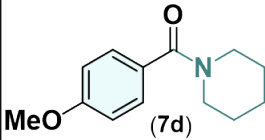 (7d) *(4-methoxyphenyl)(piperidin-1-yl)methanone* (7d): <sup>1</sup>H NMR (600 MHz, CDCl<sub>3</sub>)  $\delta$  7.37 (dd,  $J$  = 8.5, 1.5 Hz, 2H), 6.90 (dd, 2H), 3.83 (s, 3H), 3.68 – 3.64 (m, 2H), 3.43 (s, 2H), 1.70 – 1.65 (m, 2H), 1.58 (d,  $J$  = 25.8 Hz, 2H), 0.88 (t, 1H).

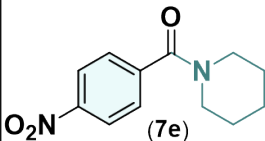 (7e) *(4-nitrophenyl)(piperidin-1-yl)methanone* (7e): <sup>1</sup>H NMR (600 MHz, CDCl<sub>3</sub>)  $\delta$  8.27 (d,  $J$  = 8.7 Hz, 2H), 7.56 (d,  $J$  = 8.7 Hz, 2H), 3.74 (d,  $J$  = 6.0 Hz, 2H), 3.29 (d, 2H), 1.75 – 1.67 (m, 2H), 1.54 (d,  $J$  = 7.7 Hz, 2H), 0.88 (t,  $J$  = 6.9 Hz, 1H). <sup>13</sup>C NMR (151 MHz, CDCl<sub>3</sub>)  $\delta$  168.3, 148.6, 143.1, 128.2, 124.2, 49.0, 43.6, 30.1, 26.9, 24.8.

## 5. <sup>1</sup>H and <sup>13</sup>C NMR spectra of products

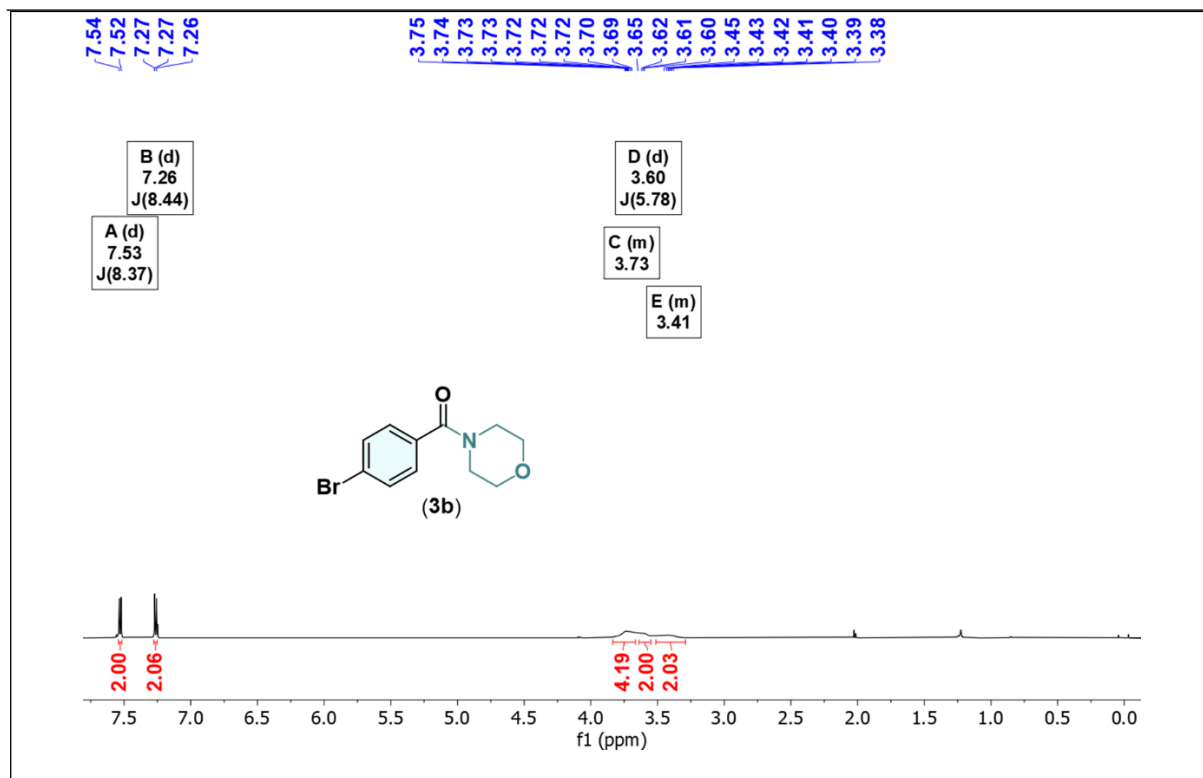

**Fig. S1.**  $^1\text{H}$ -NMR of **3b** in  $\text{CDCl}_3$  at 298K.

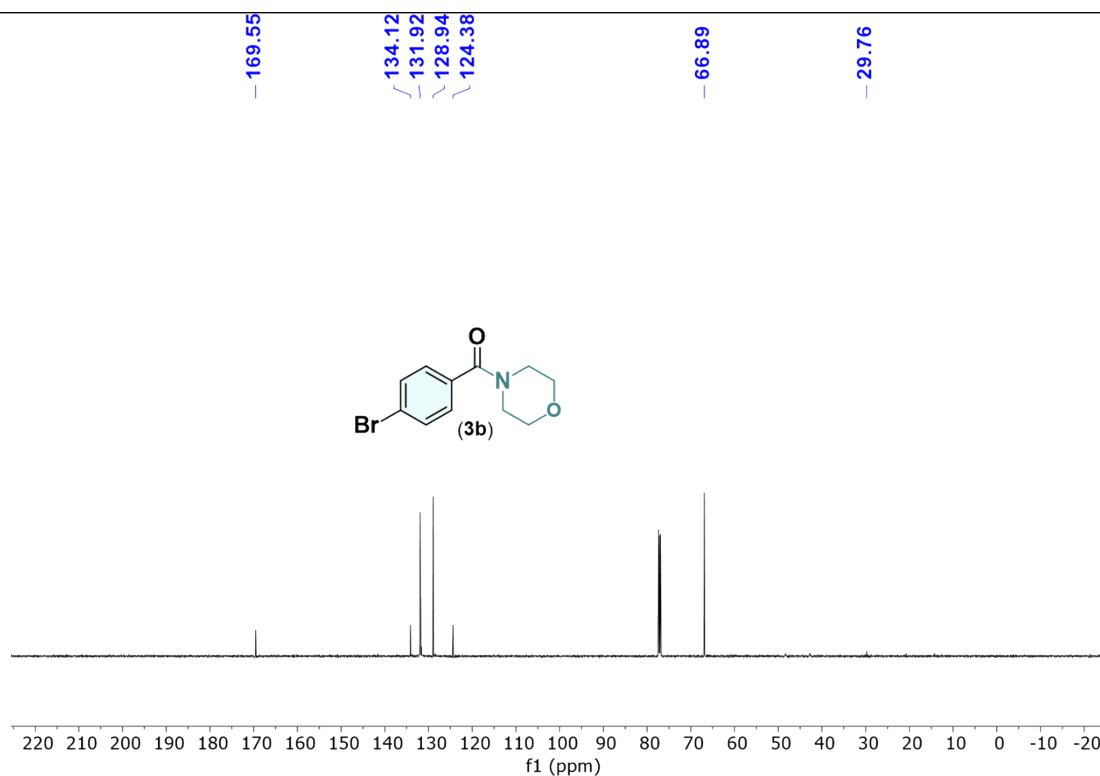

**Fig. S2.**  $^{13}\text{C}$ -NMR of **3b** in  $\text{CDCl}_3$  at 298K.

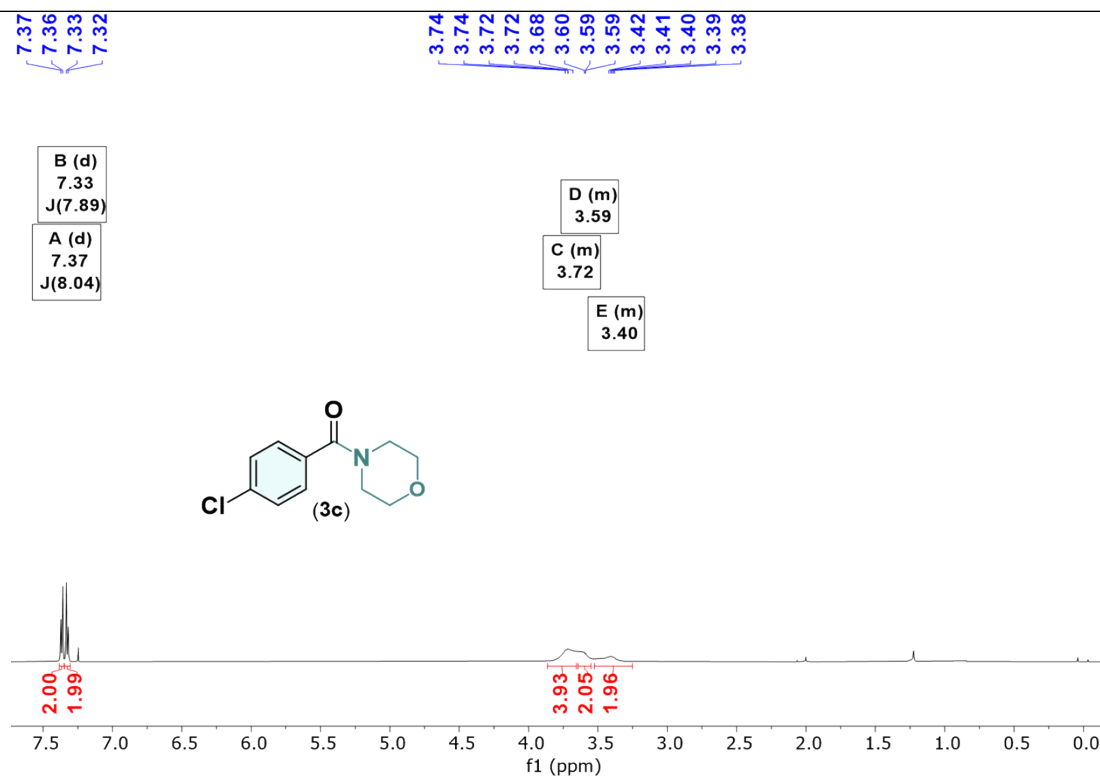

**Fig. S3.**  $^1\text{H}$ -NMR of **3c** in  $\text{CDCl}_3$  at 298K.

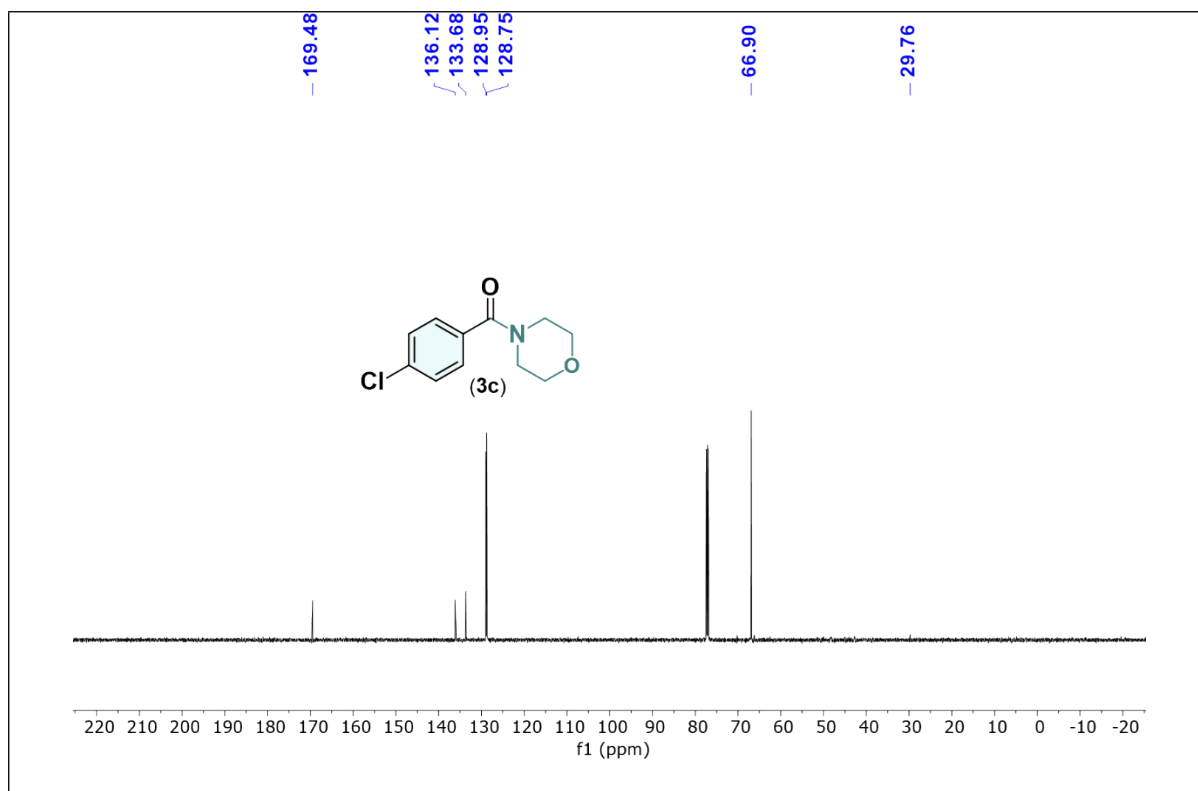

**Fig. S4.** <sup>13</sup>C-NMR of **3c** in CDCl<sub>3</sub> at 298K.

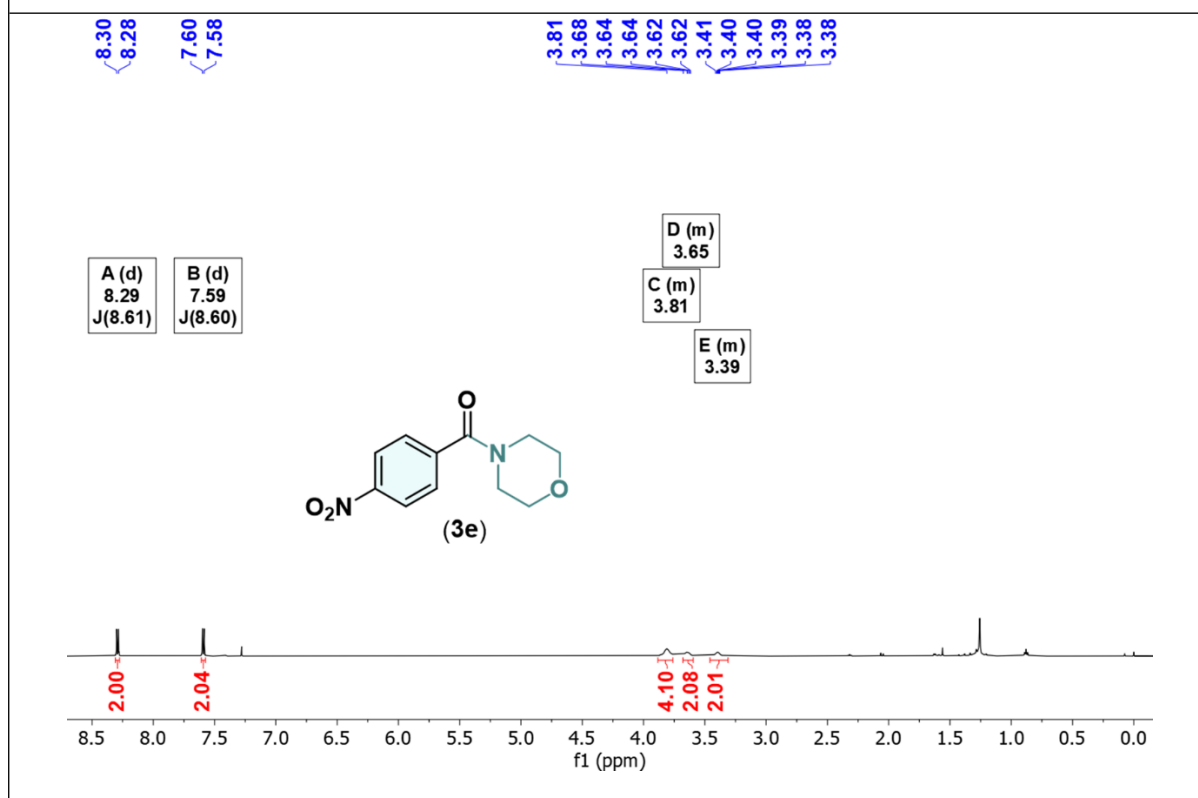

**Fig. S5.** <sup>1</sup>H-NMR of **3e** in CDCl<sub>3</sub> at 298K.

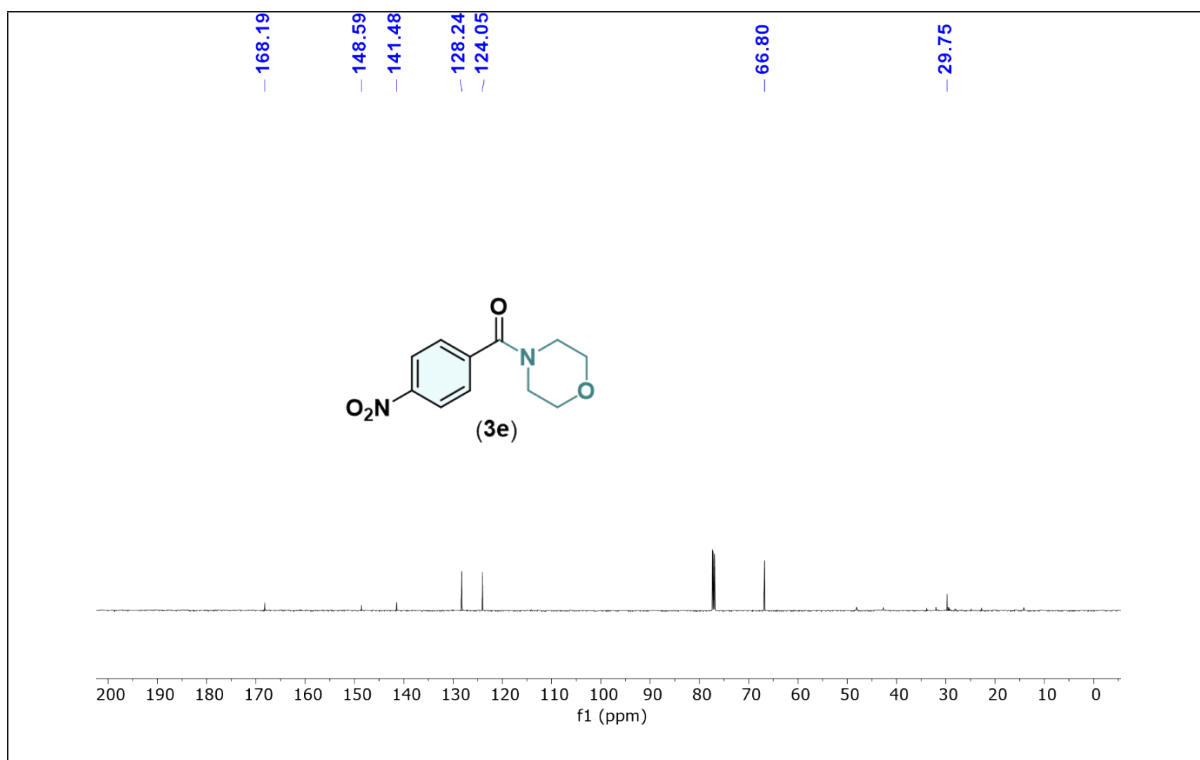

**Fig. S6.** <sup>13</sup>C-NMR of **3e** in CDCl<sub>3</sub> at 298K.

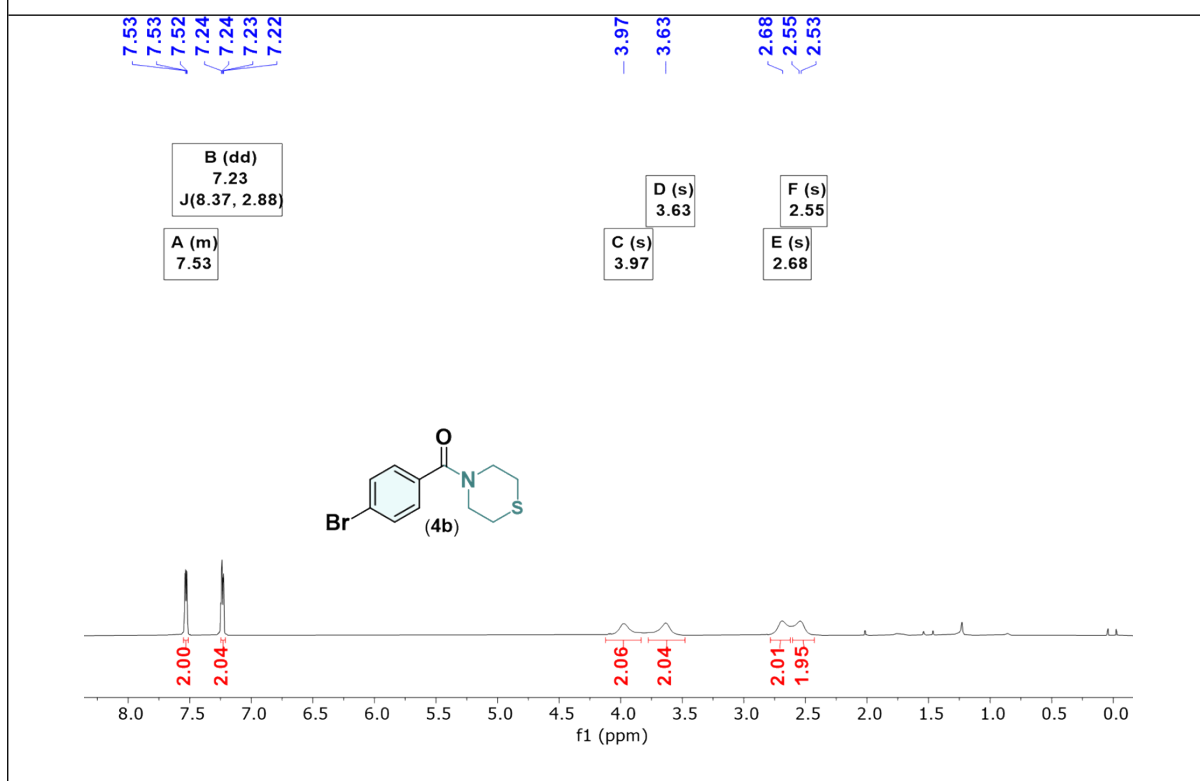

**Fig. S7.** <sup>1</sup>H-NMR of **4b** in CDCl<sub>3</sub> at 298K.

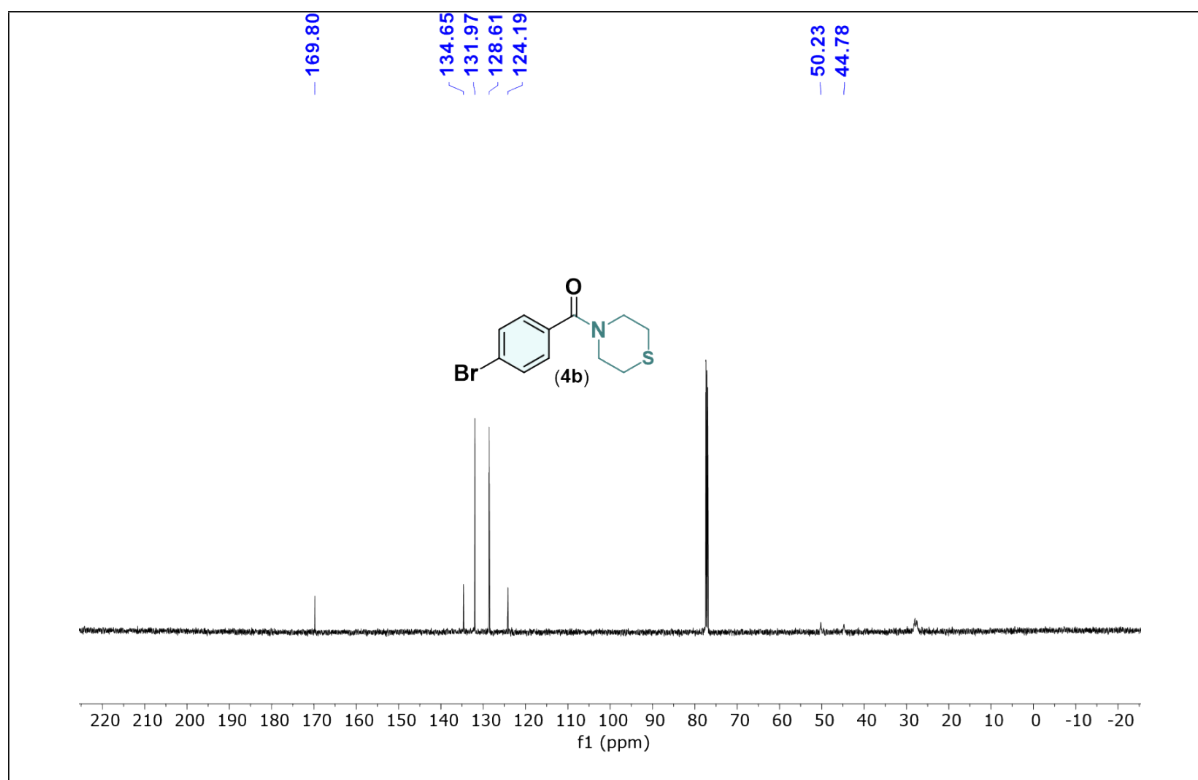

**Fig. S8.** <sup>13</sup>C-NMR of **4b** in CDCl<sub>3</sub> at 298K.

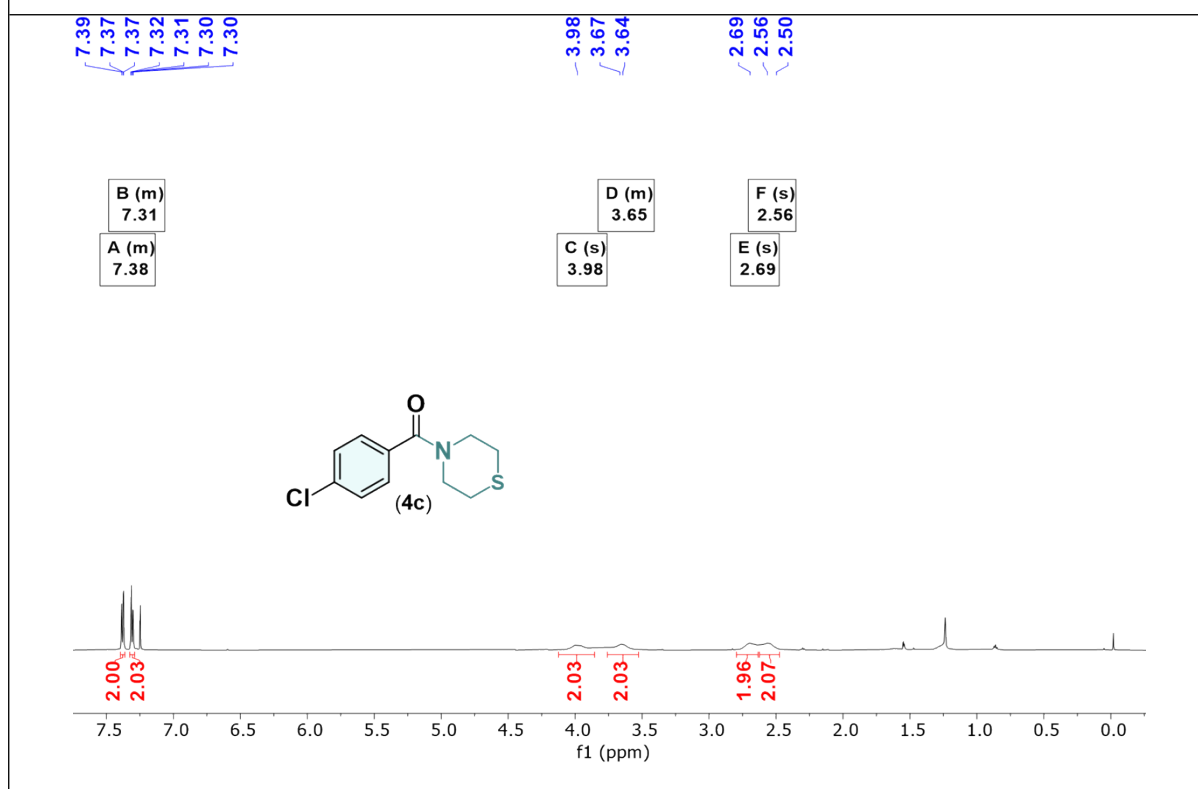

**Fig. S9.** <sup>1</sup>H-NMR of **4c** in CDCl<sub>3</sub> at 298K.

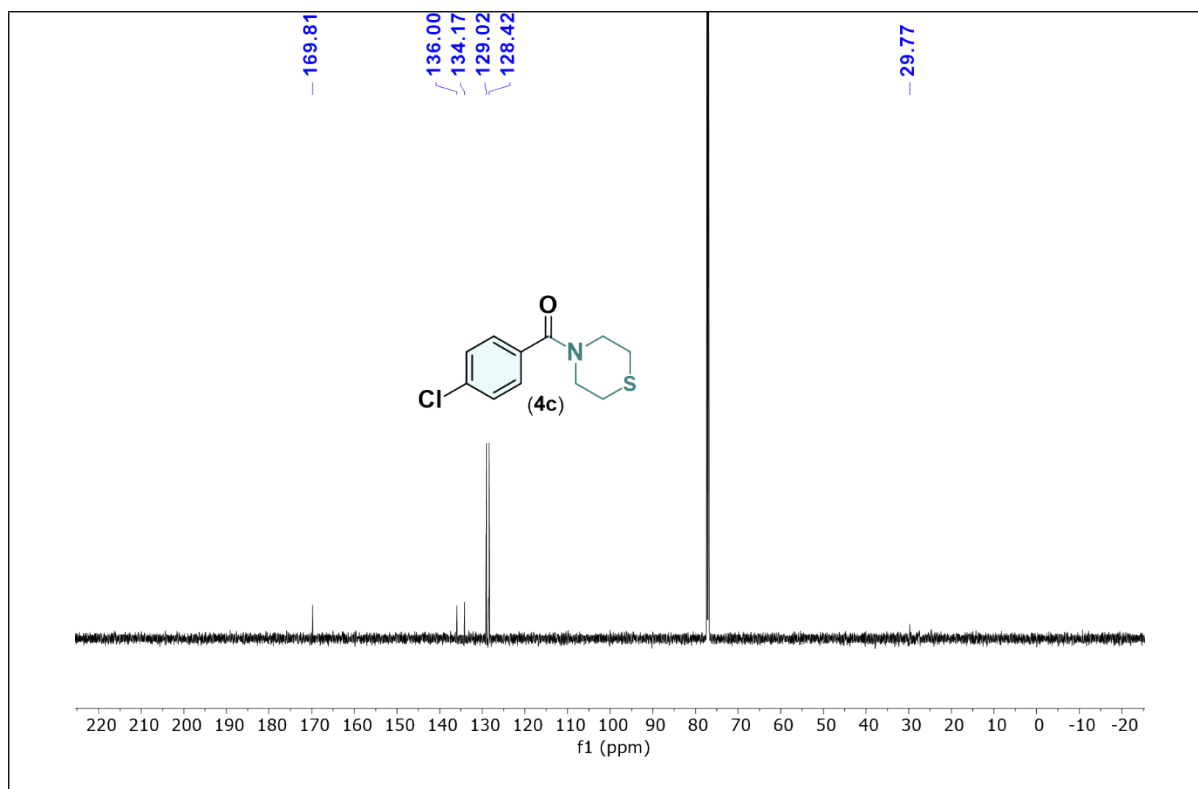

**Fig. S10.** <sup>13</sup>C-NMR of **4c** in CDCl<sub>3</sub> at 298K.

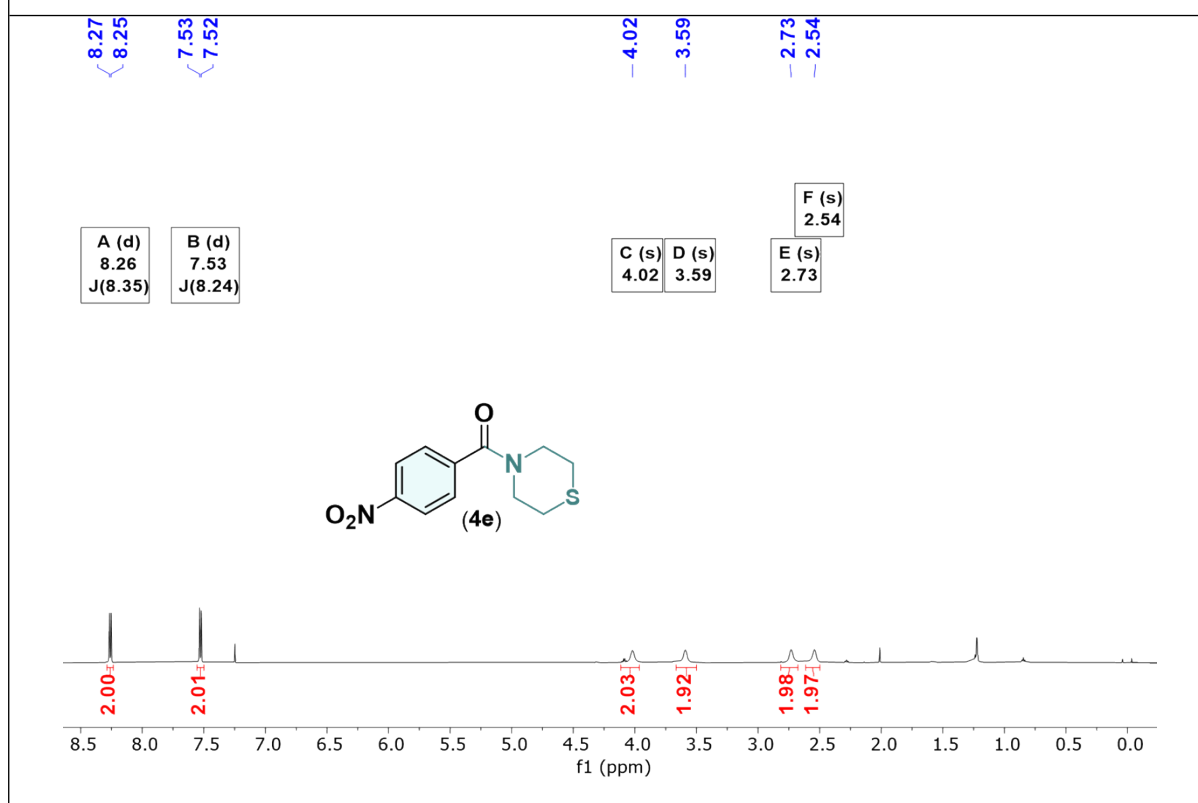

**Fig. S11.** <sup>1</sup>H-NMR of **4e** in CDCl<sub>3</sub> at 298K.

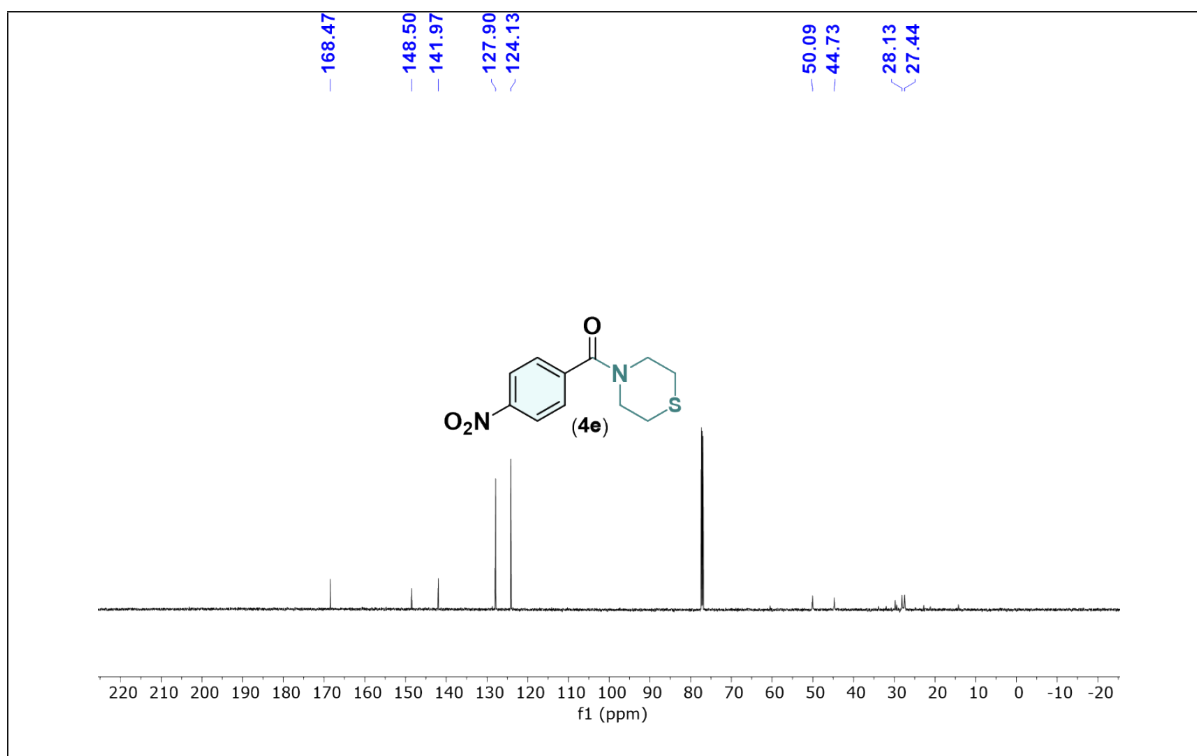

**Fig. S12.** <sup>13</sup>C-NMR of **4e** in CDCl<sub>3</sub> at 298K.

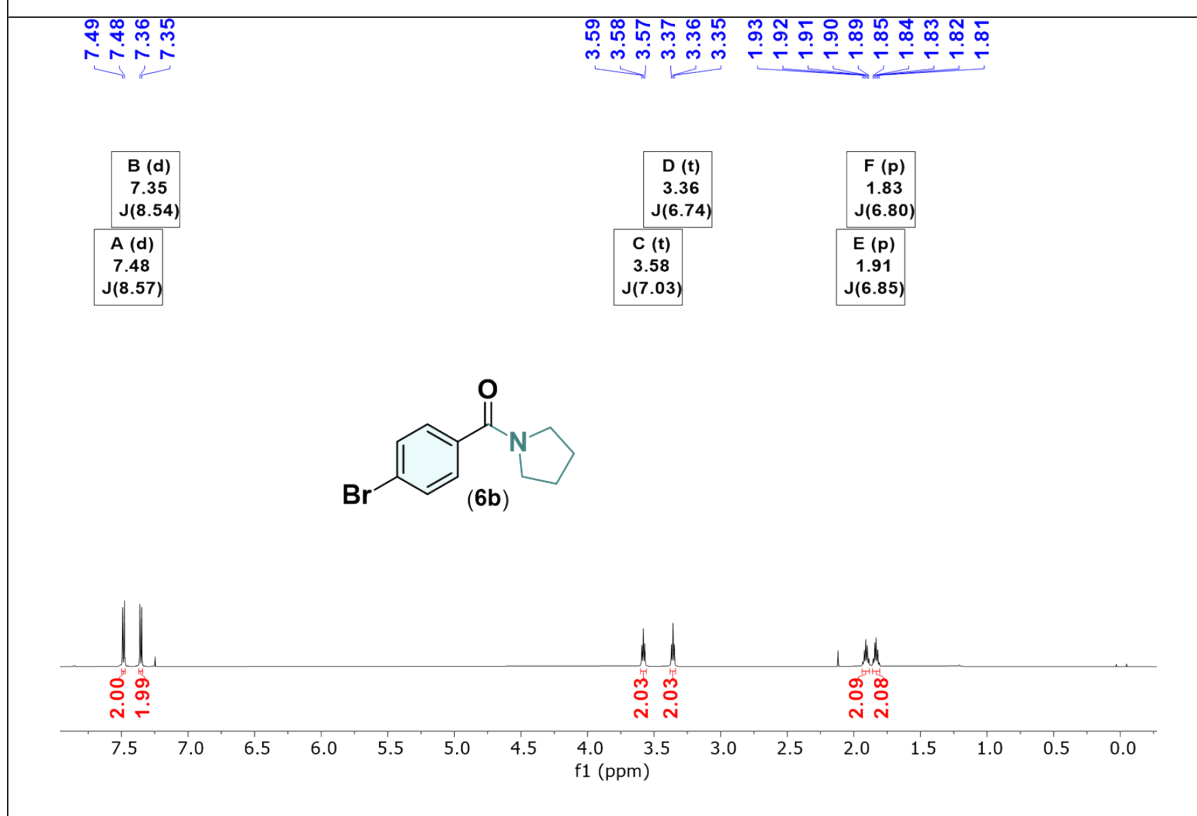

**Fig. S13.** <sup>1</sup>H-NMR of **6b** in CDCl<sub>3</sub> at 298K.

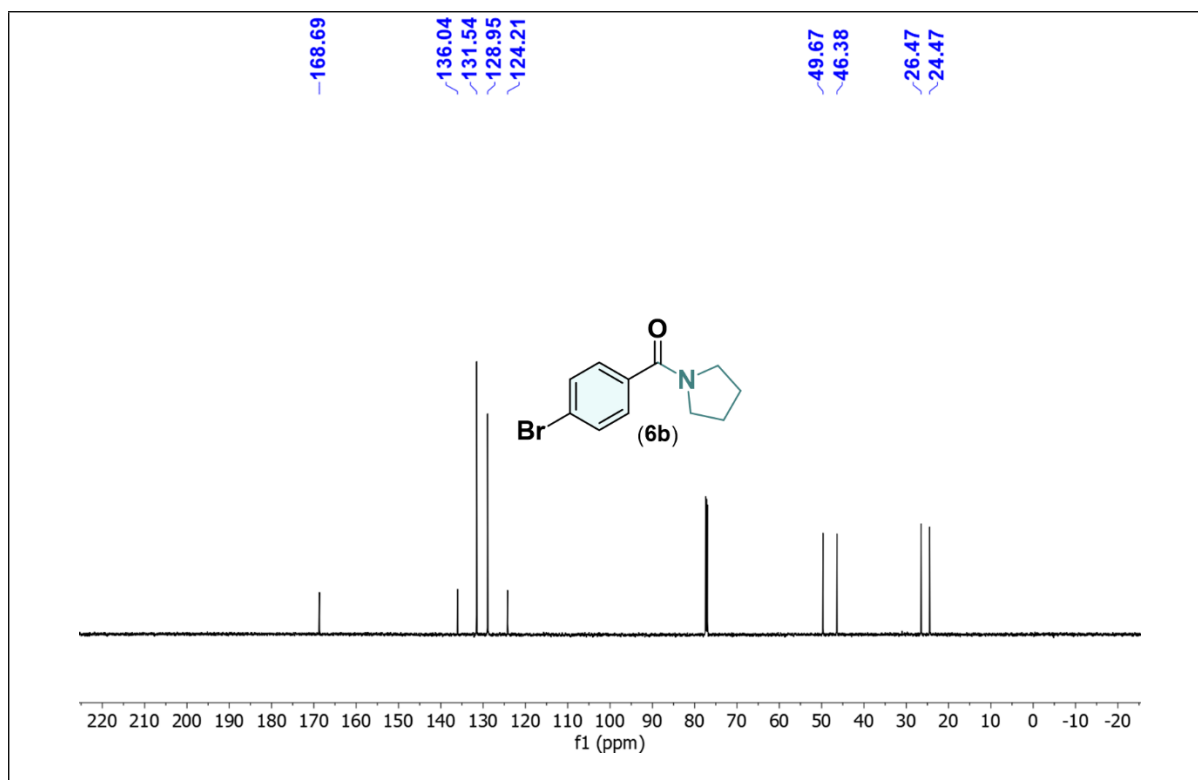

**Fig. S14.** <sup>13</sup>C-NMR of **6b** in CDCl<sub>3</sub> at 298K.

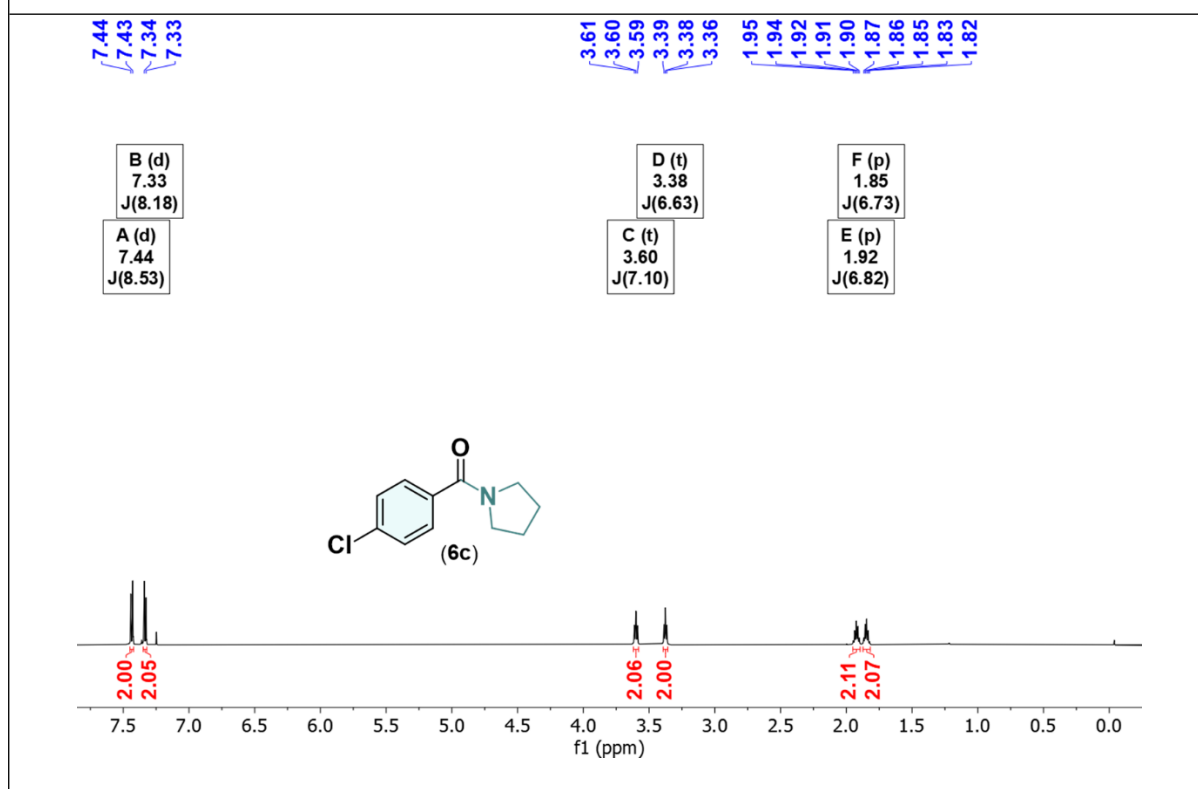

**Fig. S15.** <sup>1</sup>H-NMR of **6c** in CDCl<sub>3</sub> at 298K.

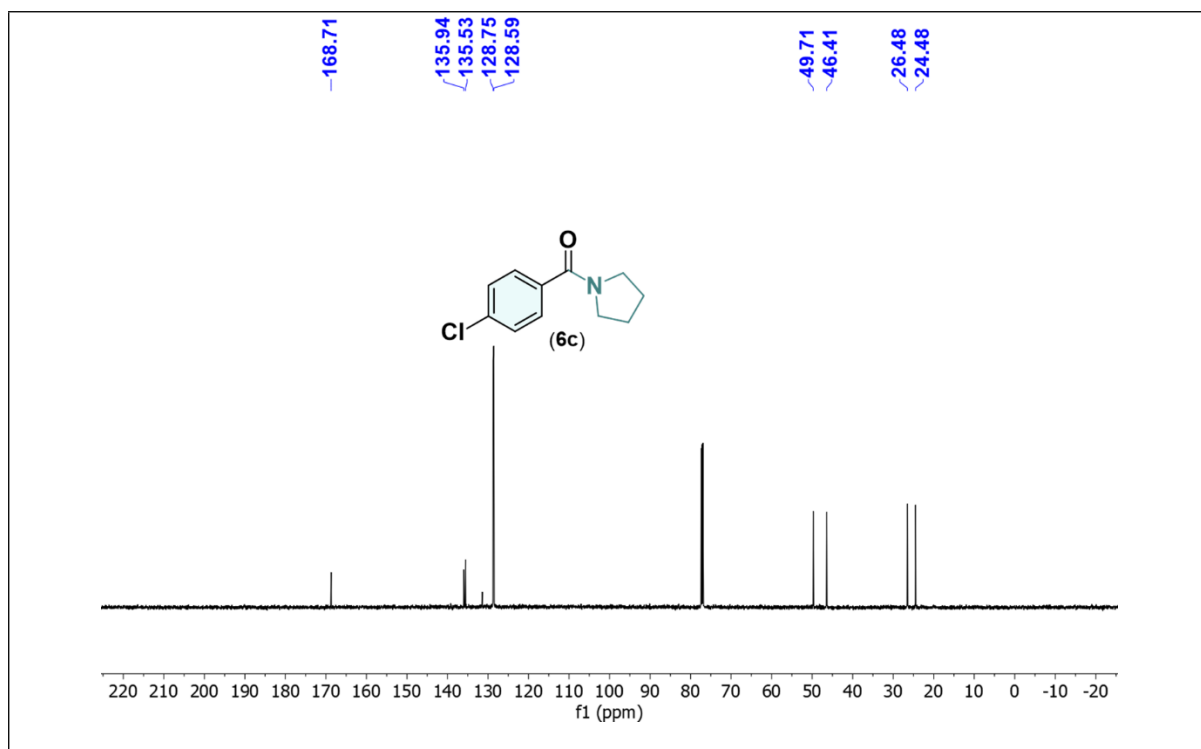

**Fig. S16.** <sup>13</sup>C-NMR of **6c** in CDCl<sub>3</sub> at 298K.

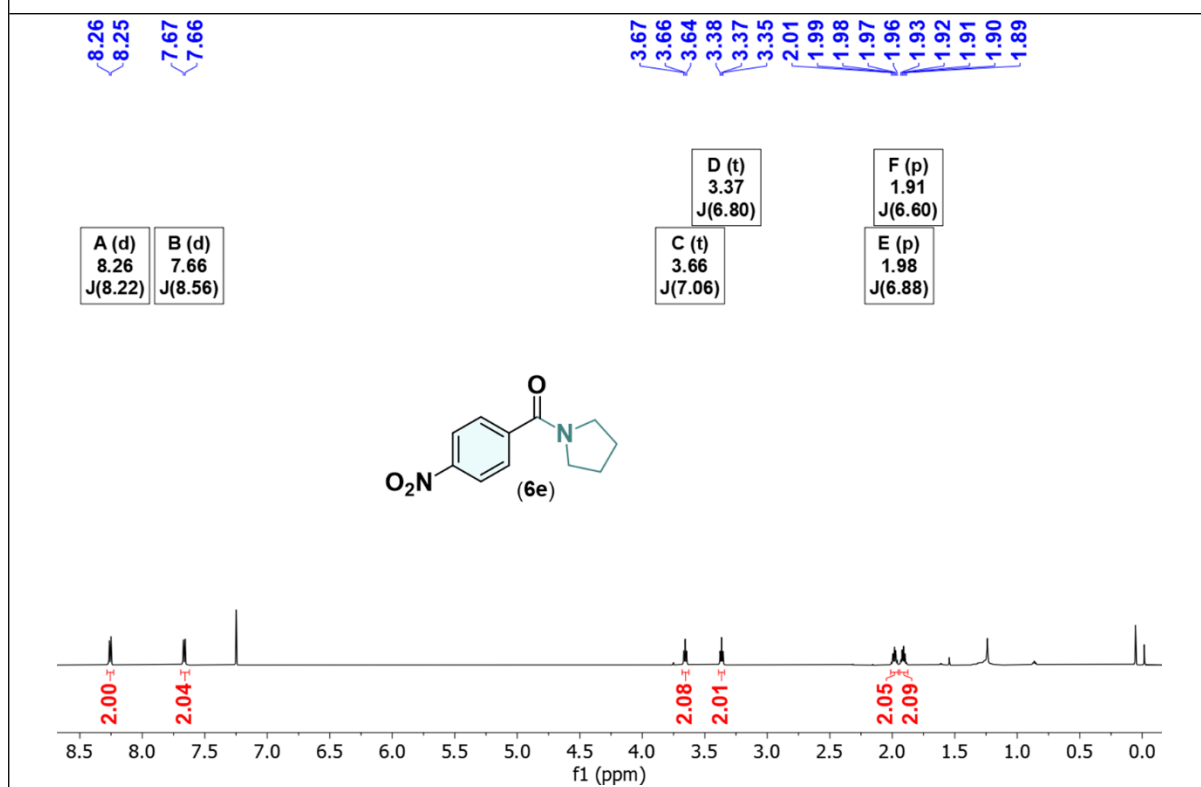

**Fig. S17.** <sup>1</sup>H-NMR of **6e** in CDCl<sub>3</sub> at 298K.

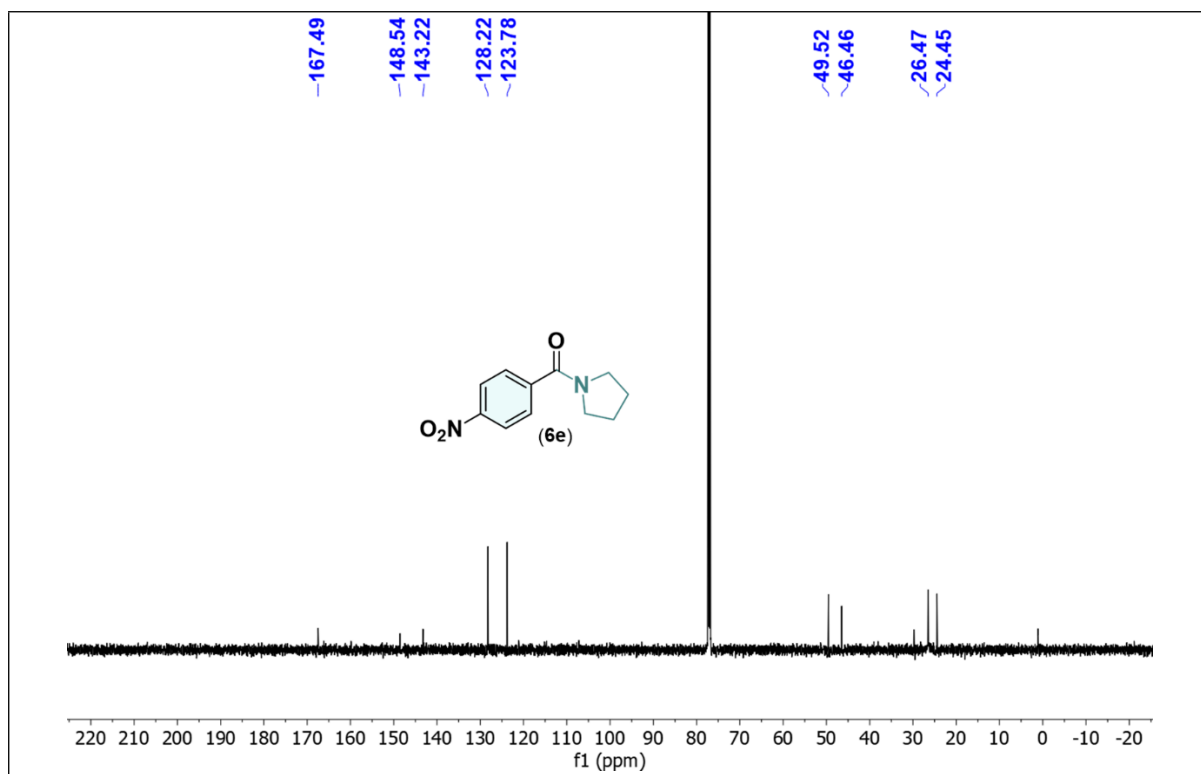

Fig. S18. <sup>13</sup>C-NMR of **6e** in CDCl<sub>3</sub> at 298K.

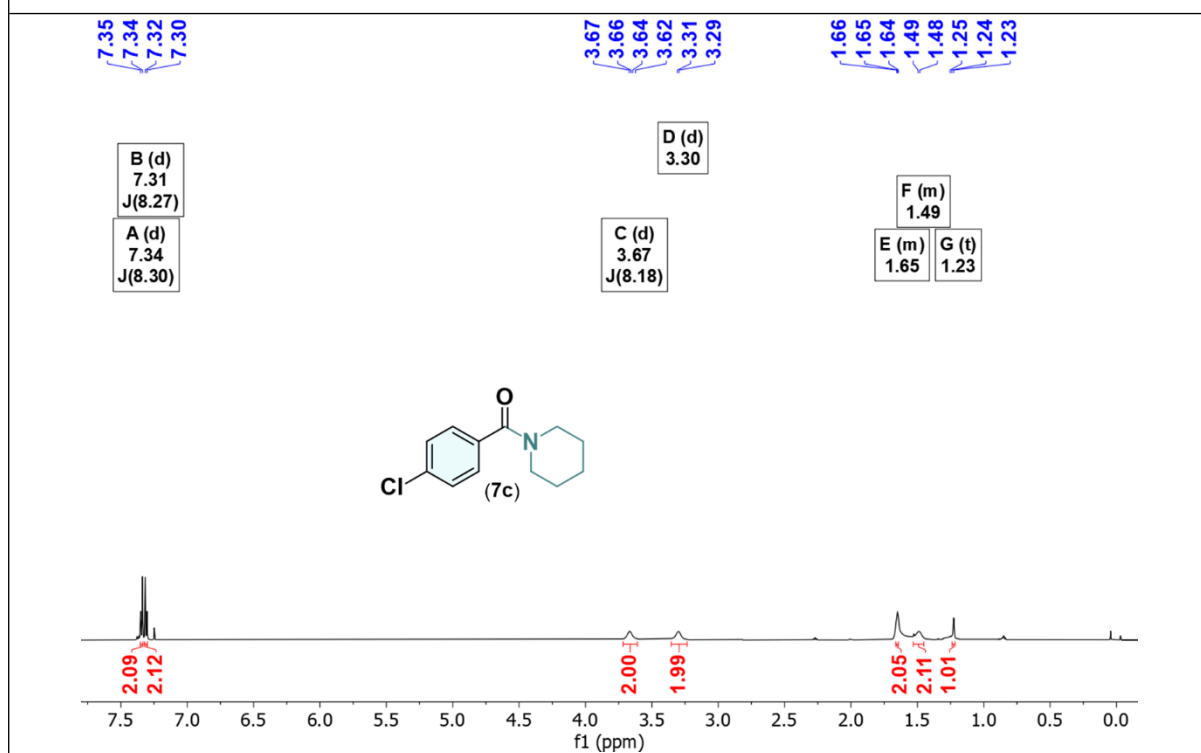

Fig. S19. <sup>1</sup>H-NMR of **7c** in CDCl<sub>3</sub> at 298K.

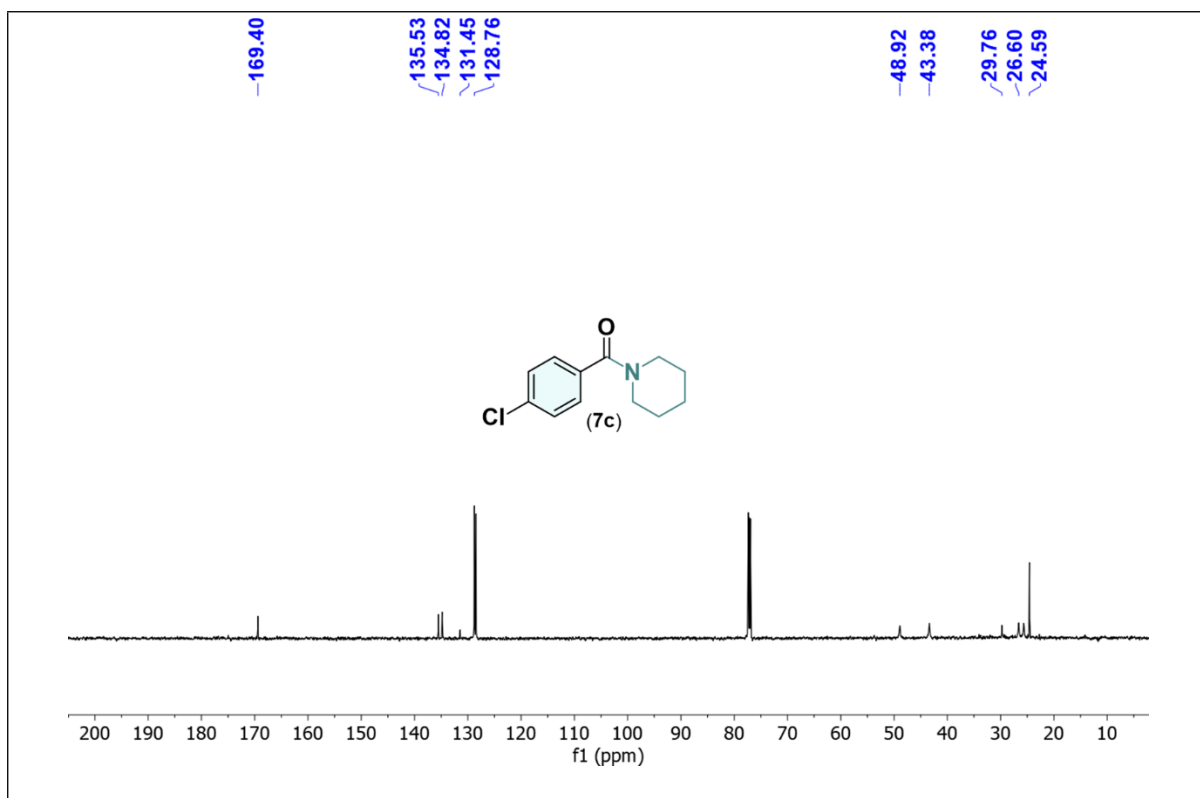

Fig. S20. <sup>13</sup>C-NMR of **7c** in CDCl<sub>3</sub> at 298K.

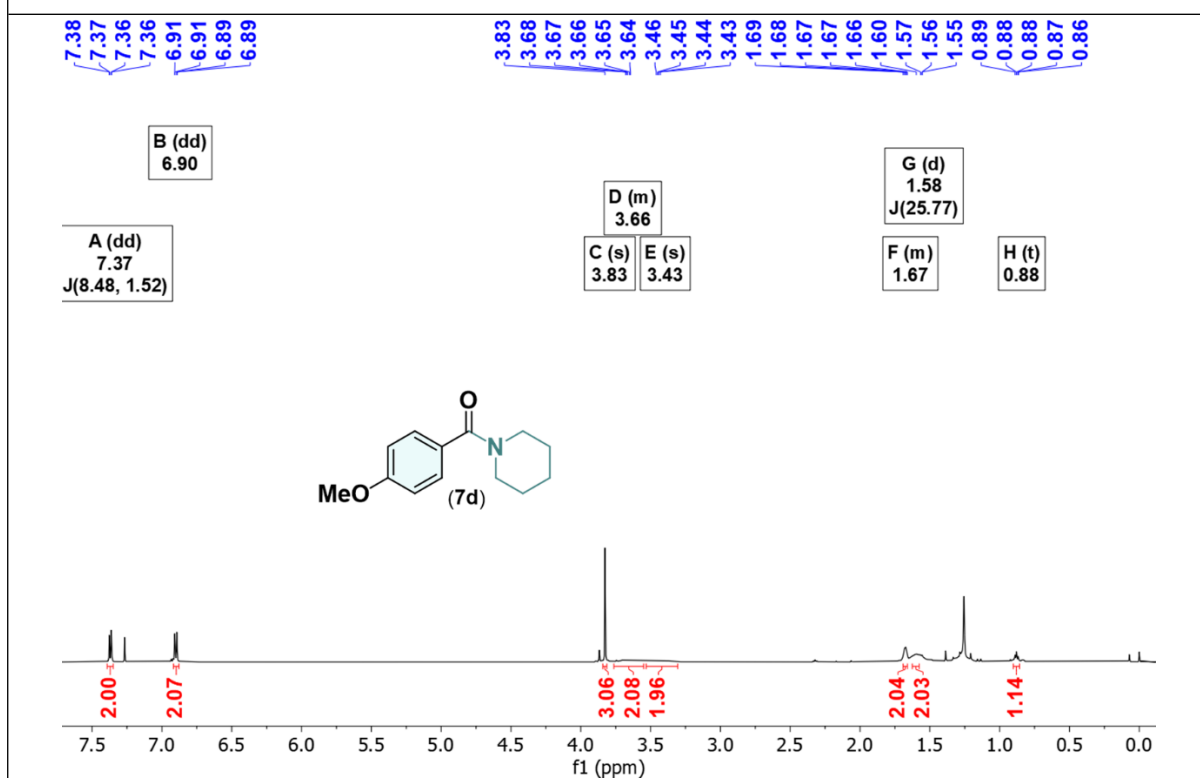

Fig. S21. <sup>1</sup>H-NMR of **7d** in CDCl<sub>3</sub> at 298K.

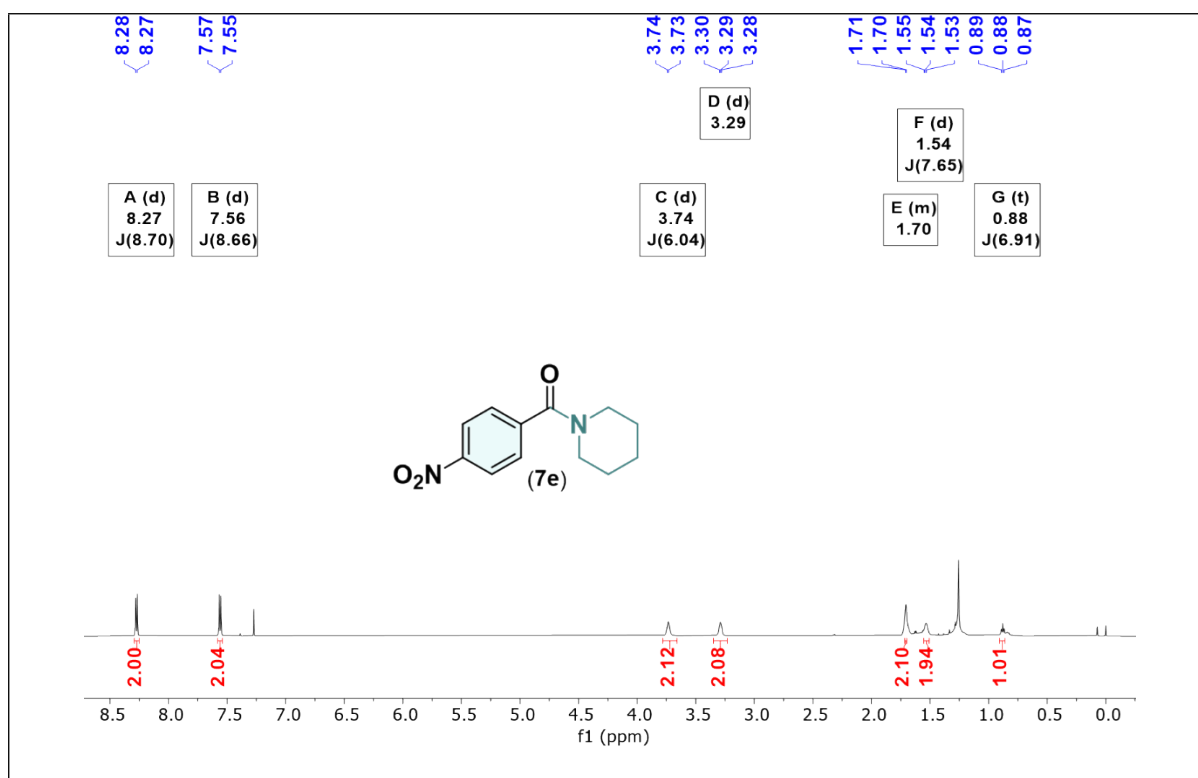

**Fig. S22.** <sup>1</sup>H-NMR of **7e** in CDCl<sub>3</sub> at 298K.

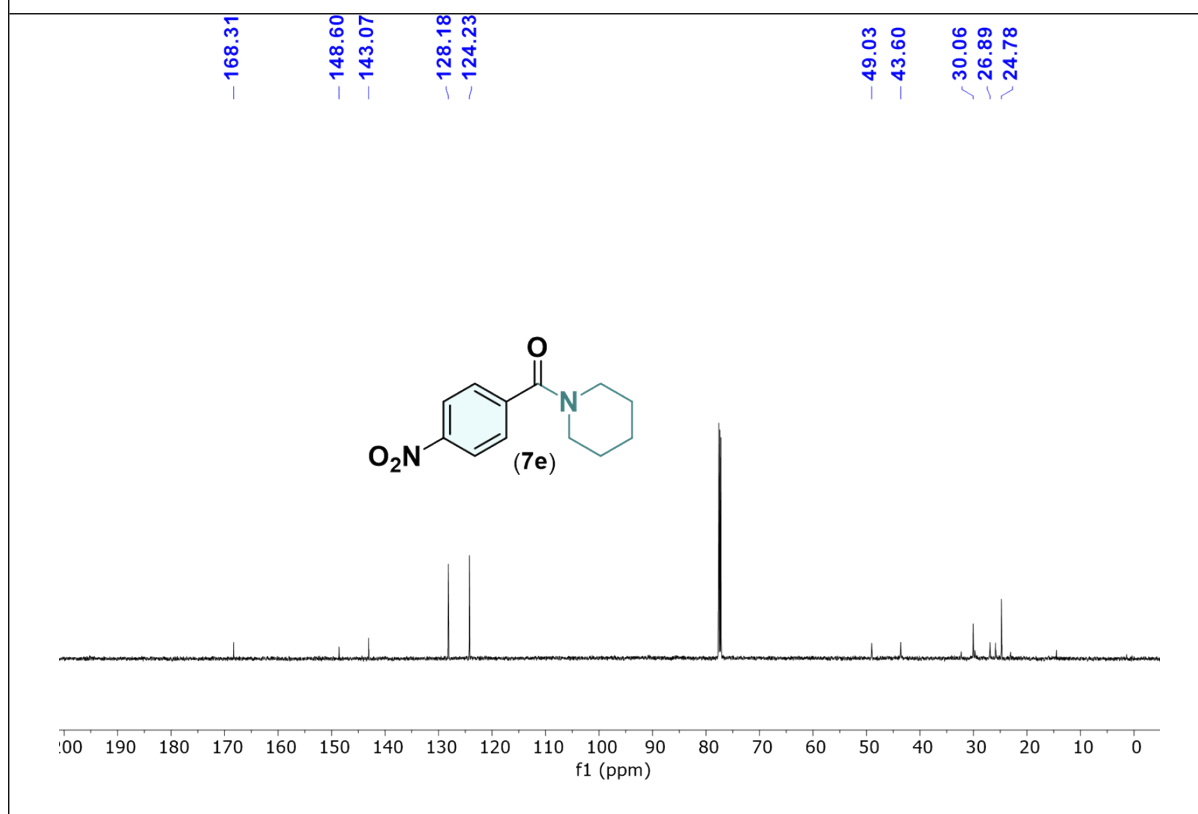

**Fig. S23.** <sup>13</sup>C-NMR of **7e** in CDCl<sub>3</sub> at 298K.

## 6. Synthesis and Characterization of Benzoate Side Product in the Oxidative Coupling of Benzaldehyde and Amine to Form Amide

### 6.1 Procedure for the synthesis of benzoate:

Acyl chloride (17.8 mM) was diluted with anhydrous tetrahydrofuran (THF, 10 mL) and cooled in an ice bath under a nitrogen atmosphere. A solution of potassium tert-butoxide (4 g, 35.6 mM, 2 equivalents) in anhydrous THF (10 mL) was slowly added via a syringe. During the addition, a precipitate of potassium chloride was observed. The reaction mixture was allowed to stir for 4 hours at the ice bath temperature. After the completion of the reaction, it was quenched by the addition of aqueous saturated sodium bicarbonate ( $\text{NaHCO}_3$ ) solution. The resulting mixture was diluted with ethyl acetate. The organic layer was separated and collected. The solvent was then evaporated under reduced pressure to afford a yellow oil product corresponding to the benzoate.

### 6.2 $^1\text{H}$ and $^{13}\text{C}$ NMR Spectra of benzoate

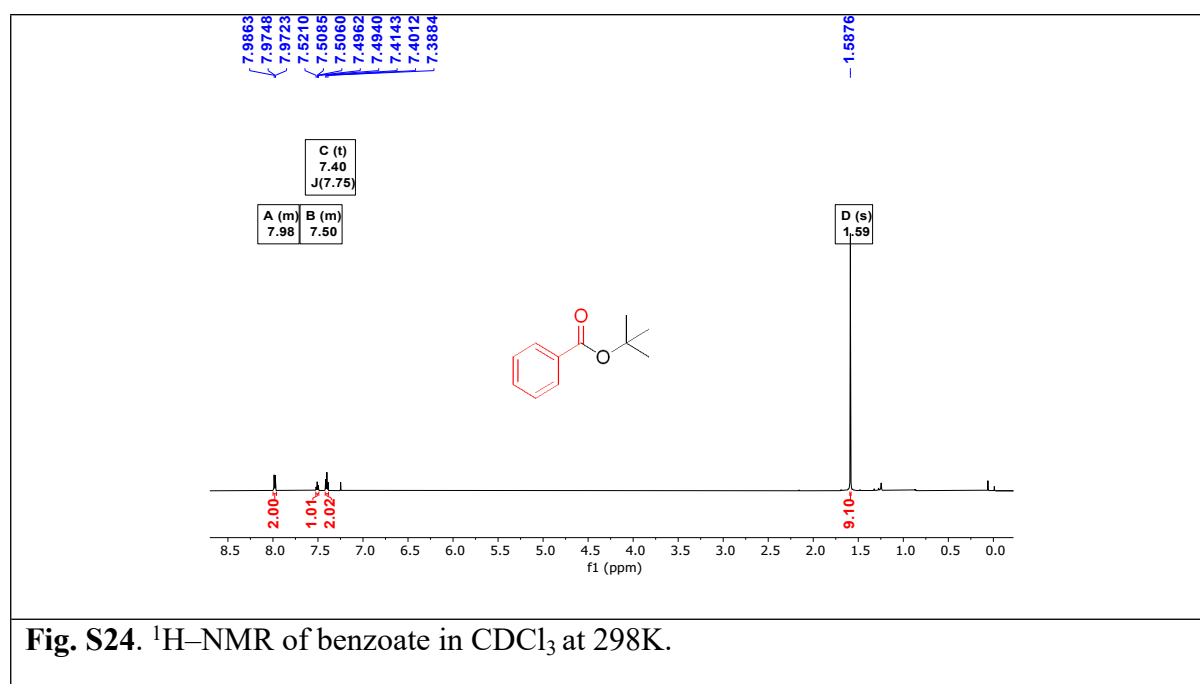

**Fig. S24.**  $^1\text{H}$ -NMR of benzoate in  $\text{CDCl}_3$  at 298K.

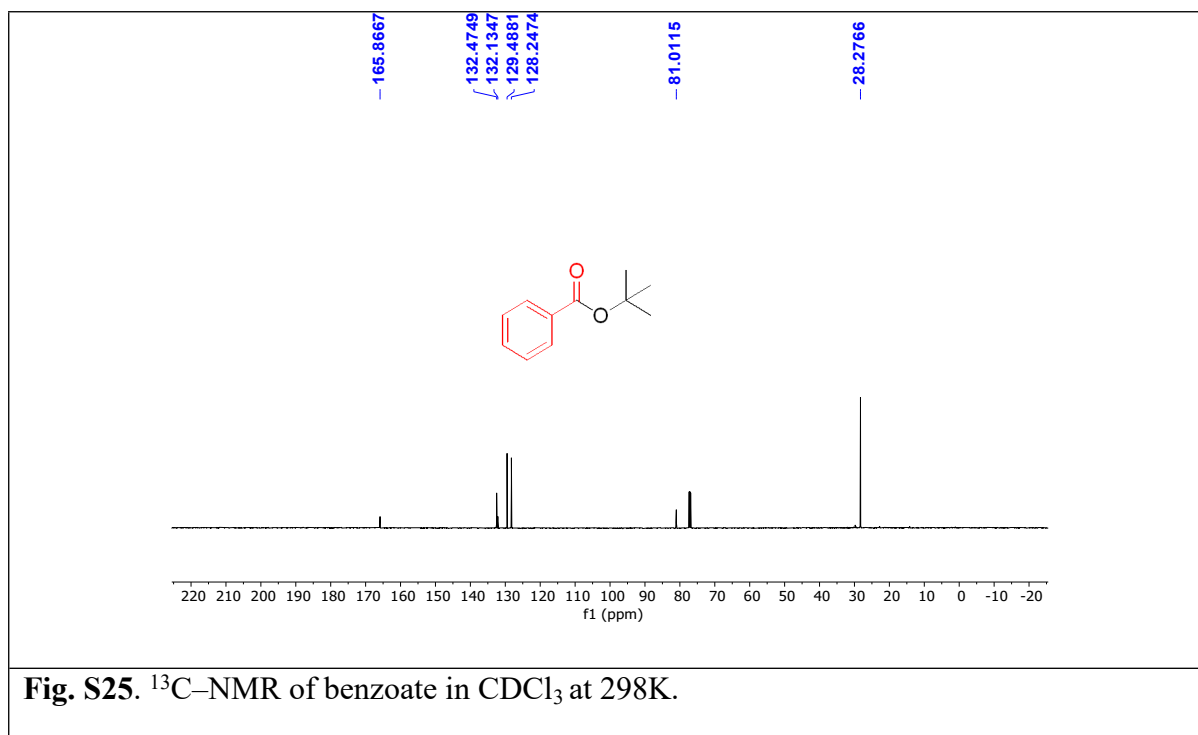

## 7. Reusability Study

Investigating material leaching, catalytic species involvement, and catalyst lifetime and durability through a series of experiments in the oxidative coupling of benzaldehyde and amine to form amide.

### 7.1 Recycling experiments for **ZN-O-A-7** for oxidative amidation

The reaction was conducted in a pressure tube with simultaneous heating/cooling, stirring, and refluxing capabilities under an inert atmosphere using the Carousel 12 Plus reaction station, maintaining a dry and oxygen-free argon/nitrogen atmosphere. In the reaction vessel, 4-nitrobenzaldehyde (1a-5, 1 mM, 152 mg) and morpholine (2a, 1 mM, 86  $\mu\text{L}$ ) were combined with 5-6 M TBHP in dodecane (224  $\mu\text{L}$ , ~1 mM) and **ZN-O-A-7** catalyst (36 mol%, 50 mg)

dissolved in 3 mL of THF. The mixture was then refluxed at 90°C for 2 hours. Upon completion of the reaction, the reaction mixture was centrifuged to recover the solid catalyst. The recovered catalyst was washed successively with water (20 mL  $\times$  2) and methanol (10 mL  $\times$  2), followed by drying at 60°C for up to 12 hours in a heating oven. Subsequently, 41 mg of solid **ZN-O-A-7** catalyst was collected and utilized for the next cycle. The THF solvent was evaporated, and water (50 mL) was added. The product was then extracted with ethyl acetate (50 mL  $\times$  3), washed with water (50 mL  $\times$  2) and brine (50 mL  $\times$  1), and dried over anhydrous Na<sub>2</sub>SO<sub>4</sub> (5 g). After solvent removal under reduced pressure, the resulting crude product was analyzed by gas chromatography-mass spectrometry (GC-MS). The activity of the **ZN-O-A-7** catalyst was monitored up to the 4<sup>th</sup> cycle. Additionally, the recovered **ZN-O-A-7** catalyst after the 2<sup>nd</sup> and 4<sup>th</sup> cycles was characterized using X-ray photoelectron spectroscopy (XPS) and powder X-ray diffraction (PXRD) techniques.

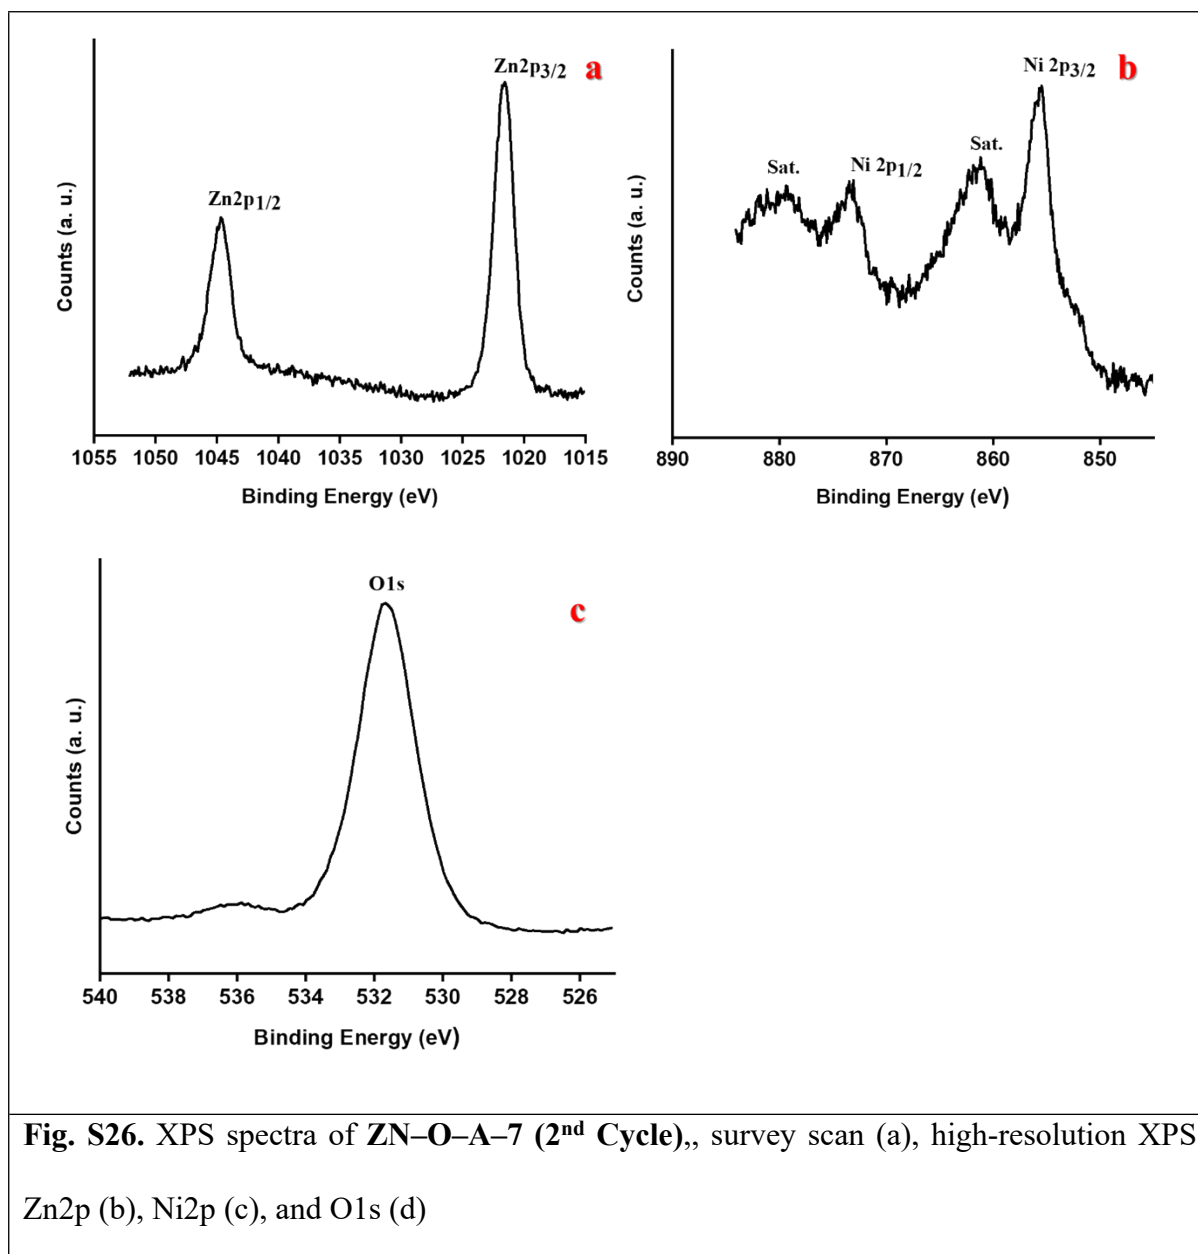

**Fig. S26.** XPS spectra of ZN-O-A-7 (2<sup>nd</sup> Cycle),, survey scan (a), high-resolution XPS Zn2p (b), Ni2p (c), and O1s (d)

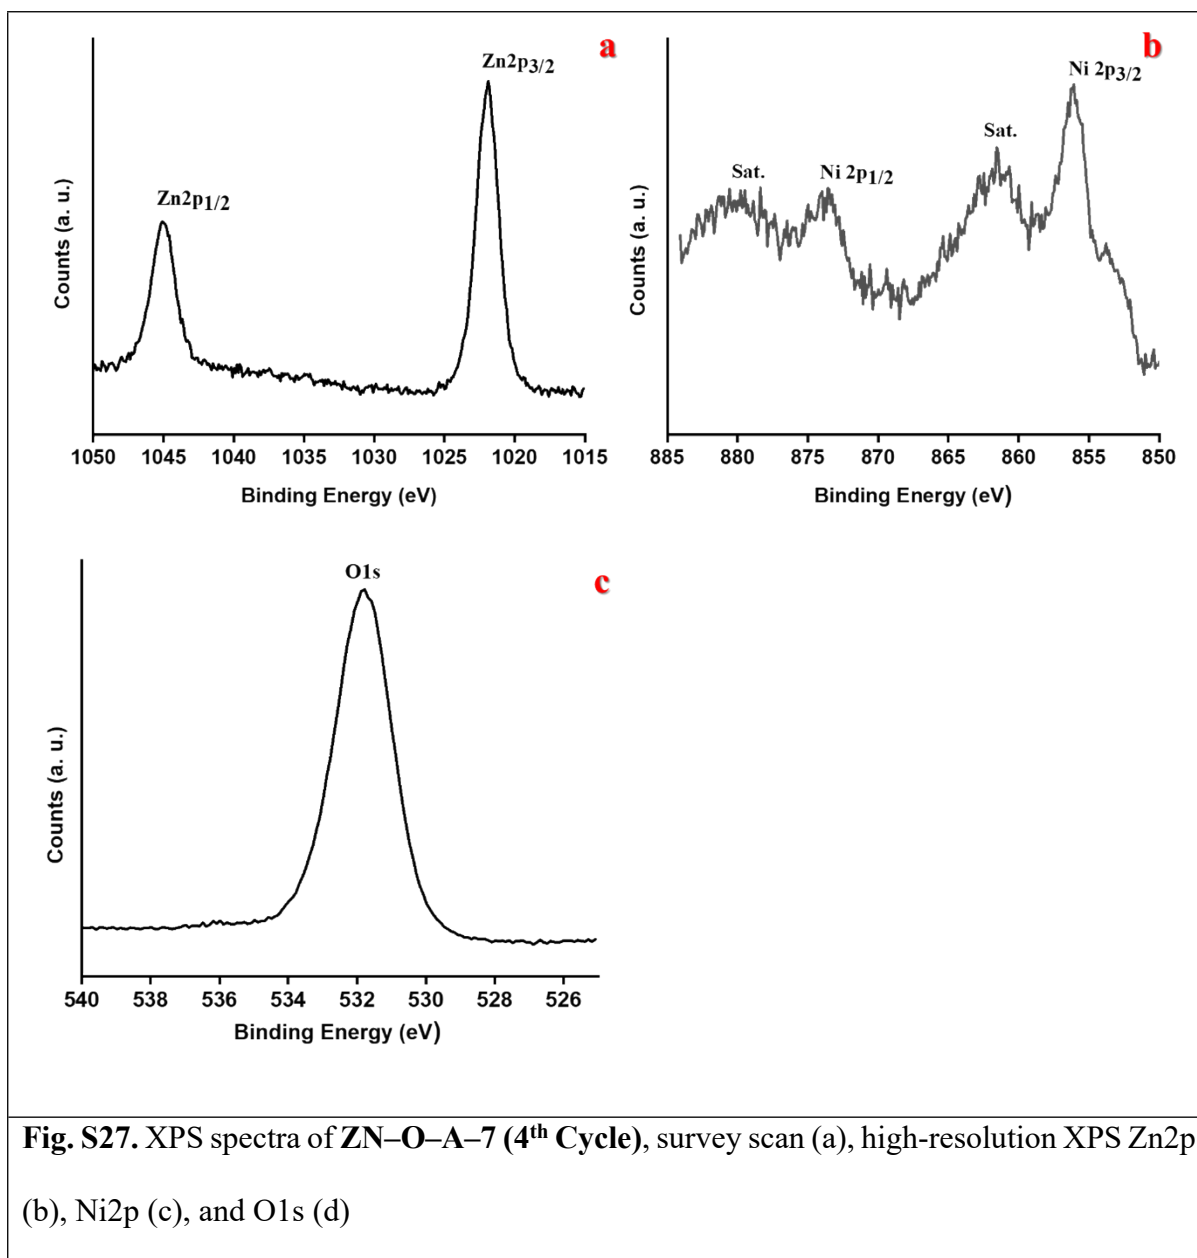

**Fig. S28.** Reference 27: Zero Pass CHEM21 green metrics toolkit.



| Supplementary Information: Appendix 2                                                                                                                                                                |           |                        |          | Summary of Zero Pass Metrics Toolkit               |             |         |           |                    |                           |                               |          |                  |          |                |                           |                               |          |  |  |  |  |
|------------------------------------------------------------------------------------------------------------------------------------------------------------------------------------------------------|-----------|------------------------|----------|----------------------------------------------------|-------------|---------|-----------|--------------------|---------------------------|-------------------------------|----------|------------------|----------|----------------|---------------------------|-------------------------------|----------|--|--|--|--|
| Yield, conversion, selectivity, AE, RME                                                                                                                                                              |           |                        |          |                                                    |             |         |           |                    |                           |                               |          |                  |          |                |                           |                               |          |  |  |  |  |
| Reactant (Limiting Reactant First)                                                                                                                                                                   | Mass (mg) | MW                     | Mol (mM) | Catalyst                                           | Mass (mol%) | Reagent | Mass (mg) | Reaction solvent   | Volume (cm <sup>3</sup> ) | Density (g ml <sup>-1</sup> ) | Mass (g) | Work up chemical | Mass (g) | Workup solvent | Volume (cm <sup>3</sup> ) | Density (g ml <sup>-1</sup> ) | Mass (g) |  |  |  |  |
| Benzaldehyde                                                                                                                                                                                         | 106.12    | 106.12                 | 1.00     | Cu                                                 | 10.00       | TBHP    | 90.12     | CH <sub>3</sub> CN | 5.00                      | 0.79                          | 3.93     |                  |          | Ethyl acetate  | 5.00                      | 0.89                          | 4.45     |  |  |  |  |
| Benzylamine                                                                                                                                                                                          | 107.15    | 107.15                 | 1.00     |                                                    |             | NCS     | 133.53    |                    |                           |                               | 0.00     |                  |          |                |                           |                               | 0.00     |  |  |  |  |
|                                                                                                                                                                                                      |           |                        |          |                                                    |             |         |           |                    |                           |                               | 0.00     |                  |          |                |                           |                               | 0.00     |  |  |  |  |
|                                                                                                                                                                                                      |           |                        |          |                                                    |             |         |           |                    |                           |                               | 0.00     |                  |          |                |                           |                               | 0.00     |  |  |  |  |
|                                                                                                                                                                                                      |           |                        |          |                                                    |             |         |           |                    |                           |                               | 0.00     |                  |          |                |                           |                               | 0.00     |  |  |  |  |
|                                                                                                                                                                                                      |           |                        |          |                                                    |             |         |           |                    |                           |                               | 0.00     |                  |          |                |                           |                               | 0.00     |  |  |  |  |
|                                                                                                                                                                                                      |           |                        |          |                                                    |             |         |           |                    |                           |                               | 0.00     |                  |          |                |                           |                               | 0.00     |  |  |  |  |
| Total                                                                                                                                                                                                | 213.27    | 213.27                 |          |                                                    | 10.00       |         | 223.65    |                    |                           |                               | 3.93     |                  | 0.00     |                |                           |                               | 4.45     |  |  |  |  |
| $AE = \frac{\text{molecular weight of product}}{\text{total molecular weight of reactants}} \times 100$<br>$RME = \frac{\text{mass of isolated product}}{\text{total mass of reactants}} \times 100$ |           |                        |          |                                                    |             |         |           | Flag               | 75.0                      | 75.0                          |          |                  |          |                |                           |                               |          |  |  |  |  |
|                                                                                                                                                                                                      |           |                        |          |                                                    |             |         |           | Yield              | 75.0                      | 75.0                          |          |                  |          |                |                           |                               |          |  |  |  |  |
|                                                                                                                                                                                                      |           |                        |          |                                                    |             |         |           | Conversion         | 100.0                     | 100.0                         |          |                  |          |                |                           |                               |          |  |  |  |  |
|                                                                                                                                                                                                      |           |                        |          |                                                    |             |         |           | Selectivity        | 75.0                      | 75.0                          |          |                  |          |                |                           |                               |          |  |  |  |  |
|                                                                                                                                                                                                      |           |                        |          |                                                    |             |         |           | AE                 | 99.1                      |                               |          |                  |          |                |                           |                               |          |  |  |  |  |
|                                                                                                                                                                                                      |           |                        |          |                                                    |             |         |           | RME                | 74.3                      |                               |          |                  |          |                |                           |                               |          |  |  |  |  |
| Solvents (Zero Pass)                                                                                                                                                                                 |           |                        |          |                                                    |             |         |           |                    |                           |                               |          |                  |          |                |                           |                               |          |  |  |  |  |
| Highly hazardous solvents (Red flag for any of the following)                                                                                                                                        |           |                        |          | List Highly Hazardous Solvents Below               |             |         |           |                    |                           |                               |          |                  |          |                |                           |                               |          |  |  |  |  |
| Et <sub>2</sub> O, Benzene, CCl <sub>4</sub> , chloroform, DCE, nitromethane, CS <sub>2</sub> , HMPA                                                                                                 |           |                        |          | None                                               |             |         |           |                    |                           |                               |          |                  |          |                |                           |                               |          |  |  |  |  |
| Health and Safety (Zero Pass)                                                                                                                                                                        |           |                        |          |                                                    |             |         |           |                    |                           |                               |          |                  |          |                |                           |                               |          |  |  |  |  |
| Health & safety (Red flag for any of the following)                                                                                                                                                  |           |                        |          | List substances plus the red flagged H-codes below |             |         |           |                    |                           |                               |          |                  |          |                |                           |                               |          |  |  |  |  |
| Highly explosive                                                                                                                                                                                     |           | H200, H201, H202, H203 |          | None                                               |             |         |           |                    |                           |                               |          |                  |          |                |                           |                               |          |  |  |  |  |
| Explosive thermal runaway                                                                                                                                                                            |           | H240                   |          | None                                               |             |         |           |                    |                           |                               |          |                  |          |                |                           |                               |          |  |  |  |  |
| Fatally toxic                                                                                                                                                                                        |           | H300, H310, H330       |          | None                                               |             |         |           |                    |                           |                               |          |                  |          |                |                           |                               |          |  |  |  |  |
| Mutagenic                                                                                                                                                                                            |           | H350                   |          | None                                               |             |         |           |                    |                           |                               |          |                  |          |                |                           |                               |          |  |  |  |  |
| Repro-toxic                                                                                                                                                                                          |           | H360                   |          | None                                               |             |         |           |                    |                           |                               |          |                  |          |                |                           |                               |          |  |  |  |  |
| Serious environmental implications                                                                                                                                                                   |           | H420                   |          | None                                               |             |         |           |                    |                           |                               |          |                  |          |                |                           |                               |          |  |  |  |  |
|                                                                                                                                                                                                      |           |                        |          |                                                    |             |         |           |                    |                           |                               |          |                  |          |                |                           |                               |          |  |  |  |  |
|                                                                                                                                                                                                      |           |                        |          |                                                    |             |         |           |                    |                           |                               |          |                  |          |                |                           |                               |          |  |  |  |  |
|                                                                                                                                                                                                      |           |                        |          |                                                    |             |         |           |                    |                           |                               |          |                  |          |                |                           |                               |          |  |  |  |  |
|                                                                                                                                                                                                      |           |                        |          |                                                    |             |         |           |                    |                           |                               |          |                  |          |                |                           |                               |          |  |  |  |  |
|                                                                                                                                                                                                      |           |                        |          |                                                    |             |         |           |                    |                           |                               |          |                  |          |                |                           |                               |          |  |  |  |  |
|                                                                                                                                                                                                      |           |                        |          |                                                    |             |         |           |                    |                           |                               |          |                  |          |                |                           |                               |          |  |  |  |  |
|                                                                                                                                                                                                      |           |                        |          |                                                    |             |         |           |                    |                           |                               |          |                  |          |                |                           |                               |          |  |  |  |  |
|                                                                                                                                                                                                      |           |                        |          |                                                    |             |         |           |                    |                           |                               |          |                  |          |                |                           |                               |          |  |  |  |  |
|                                                                                                                                                                                                      |           |                        |          |                                                    |             |         |           |                    |                           |                               |          |                  |          |                |                           |                               |          |  |  |  |  |
|                                                                                                                                                                                                      |           |                        |          |                                                    |             |         |           |                    |                           |                               |          |                  |          |                |                           |                               |          |  |  |  |  |
|                                                                                                                                                                                                      |           |                        |          |                                                    |             |         |           |                    |                           |                               |          |                  |          |                |                           |                               |          |  |  |  |  |
|                                                                                                                                                                                                      |           |                        |          |                                                    |             |         |           |                    |                           |                               |          |                  |          |                |                           |                               |          |  |  |  |  |
|                                                                                                                                                                                                      |           |                        |          |                                                    |             |         |           |                    |                           |                               |          |                  |          |                |                           |                               |          |  |  |  |  |
|                                                                                                                                                                                                      |           |                        |          |                                                    |             |         |           |                    |                           |                               |          |                  |          |                |                           |                               |          |  |  |  |  |
|                                                                                                                                                                                                      |           |                        |          |                                                    |             |         |           |                    |                           |                               |          |                  |          |                |                           |                               |          |  |  |  |  |
|                                                                                                                                                                                                      |           |                        |          |                                                    |             |         |           |                    |                           |                               |          |                  |          |                |                           |                               |          |  |  |  |  |
|                                                                                                                                                                                                      |           |                        |          |                                                    |             |         |           |                    |                           |                               |          |                  |          |                |                           |                               |          |  |  |  |  |
|                                                                                                                                                                                                      |           |                        |          |                                                    |             |         |           |                    |                           |                               |          |                  |          |                |                           |                               |          |  |  |  |  |
|                                                                                                                                                                                                      |           |                        |          |                                                    |             |         |           |                    |                           |                               |          |                  |          |                |                           |                               |          |  |  |  |  |
|                                                                                                                                                                                                      |           |                        |          |                                                    |             |         |           |                    |                           |                               |          |                  |          |                |                           |                               |          |  |  |  |  |
|                                                                                                                                                                                                      |           |                        |          |                                                    |             |         |           |                    |                           |                               |          |                  |          |                |                           |                               |          |  |  |  |  |
|                                                                                                                                                                                                      |           |                        |          |                                                    |             |         |           |                    |                           |                               |          |                  |          |                |                           |                               |          |  |  |  |  |
|                                                                                                                                                                                                      |           |                        |          |                                                    |             |         |           |                    |                           |                               |          |                  |          |                |                           |                               |          |  |  |  |  |
|                                                                                                                                                                                                      |           |                        |          |                                                    |             |         |           |                    |                           |                               |          |                  |          |                |                           |                               |          |  |  |  |  |
|                                                                                                                                                                                                      |           |                        |          |                                                    |             |         |           |                    |                           |                               |          |                  |          |                |                           |                               |          |  |  |  |  |
|                                                                                                                                                                                                      |           |                        |          |                                                    |             |         |           |                    |                           |                               |          |                  |          |                |                           |                               |          |  |  |  |  |
|                                                                                                                                                                                                      |           |                        |          |                                                    |             |         |           |                    |                           |                               |          |                  |          |                |                           |                               |          |  |  |  |  |
|                                                                                                                                                                                                      |           |                        |          |                                                    |             |         |           |                    |                           |                               |          |                  |          |                |                           |                               |          |  |  |  |  |
|                                                                                                                                                                                                      |           |                        |          |                                                    |             |         |           |                    |                           |                               |          |                  |          |                |                           |                               |          |  |  |  |  |
|                                                                                                                                                                                                      |           |                        |          |                                                    |             |         |           |                    |                           |                               |          |                  |          |                |                           |                               |          |  |  |  |  |
|                                                                                                                                                                                                      |           |                        |          |                                                    |             |         |           |                    |                           |                               |          |                  |          |                |                           |                               |          |  |  |  |  |
|                                                                                                                                                                                                      |           |                        |          |                                                    |             |         |           |                    |                           |                               |          |                  |          |                |                           |                               |          |  |  |  |  |
|                                                                                                                                                                                                      |           |                        |          |                                                    |             |         |           |                    |                           |                               |          |                  |          |                |                           |                               |          |  |  |  |  |
|                                                                                                                                                                                                      |           |                        |          |                                                    |             |         |           |                    |                           |                               |          |                  |          |                |                           |                               |          |  |  |  |  |
|                                                                                                                                                                                                      |           |                        |          |                                                    |             |         |           |                    |                           |                               |          |                  |          |                |                           |                               |          |  |  |  |  |
|                                                                                                                                                                                                      |           |                        |          |                                                    |             |         |           |                    |                           |                               |          |                  |          |                |                           |                               |          |  |  |  |  |
|                                                                                                                                                                                                      |           |                        |          |                                                    |             |         |           |                    |                           |                               |          |                  |          |                |                           |                               |          |  |  |  |  |
|                                                                                                                                                                                                      |           |                        |          |                                                    |             |         |           |                    |                           |                               |          |                  |          |                |                           |                               |          |  |  |  |  |
|                                                                                                                                                                                                      |           |                        |          |                                                    |             |         |           |                    |                           |                               |          |                  |          |                |                           |                               |          |  |  |  |  |
|                                                                                                                                                                                                      |           |                        |          |                                                    |             |         |           |                    |                           |                               |          |                  |          |                |                           |                               |          |  |  |  |  |
|                                                                                                                                                                                                      |           |                        |          |                                                    |             |         |           |                    |                           |                               |          |                  |          |                |                           |                               |          |  |  |  |  |
|                                                                                                                                                                                                      |           |                        |          |                                                    |             |         |           |                    |                           |                               |          |                  |          |                |                           |                               |          |  |  |  |  |
|                                                                                                                                                                                                      |           |                        |          |                                                    |             |         |           |                    |                           |                               |          |                  |          |                |                           |                               |          |  |  |  |  |
|                                                                                                                                                                                                      |           |                        |          |                                                    |             |         |           |                    |                           |                               |          |                  |          |                |                           |                               |          |  |  |  |  |
|                                                                                                                                                                                                      |           |                        |          |                                                    |             |         |           |                    |                           |                               |          |                  |          |                |                           |                               |          |  |  |  |  |
|                                                                                                                                                                                                      |           |                        |          |                                                    |             |         |           |                    |                           |                               |          |                  |          |                |                           |                               |          |  |  |  |  |
|                                                                                                                                                                                                      |           |                        |          |                                                    |             |         |           |                    |                           |                               |          |                  |          |                |                           |                               |          |  |  |  |  |
|                                                                                                                                                                                                      |           |                        |          |                                                    |             |         |           |                    |                           |                               |          |                  |          |                |                           |                               |          |  |  |  |  |
|                                                                                                                                                                                                      |           |                        |          |                                                    |             |         |           |                    |                           |                               |          |                  |          |                |                           |                               |          |  |  |  |  |
|                                                                                                                                                                                                      |           |                        |          |                                                    |             |         |           |                    |                           |                               |          |                  |          |                |                           |                               |          |  |  |  |  |
|                                                                                                                                                                                                      |           |                        |          |                                                    |             |         |           |                    |                           |                               |          |                  |          |                |                           |                               |          |  |  |  |  |
|                                                                                                                                                                                                      |           |                        |          |                                                    |             |         |           |                    |                           |                               |          |                  |          |                |                           |                               |          |  |  |  |  |
|                                                                                                                                                                                                      |           |                        |          |                                                    |             |         |           |                    |                           |                               |          |                  |          |                |                           |                               |          |  |  |  |  |
|                                                                                                                                                                                                      |           |                        |          |                                                    |             |         |           |                    |                           |                               |          |                  |          |                |                           |                               |          |  |  |  |  |
|                                                                                                                                                                                                      |           |                        |          |                                                    |             |         |           |                    |                           |                               |          |                  |          |                |                           |                               |          |  |  |  |  |
|                                                                                                                                                                                                      |           |                        |          |                                                    |             |         |           |                    |                           |                               |          |                  |          |                |                           |                               |          |  |  |  |  |
|                                                                                                                                                                                                      |           |                        |          |                                                    |             |         |           |                    |                           |                               |          |                  |          |                |                           |                               |          |  |  |  |  |
|                                                                                                                                                                                                      |           |                        |          |                                                    |             |         |           |                    |                           |                               |          |                  |          |                |                           |                               |          |  |  |  |  |
|                                                                                                                                                                                                      |           |                        |          |                                                    |             |         |           |                    |                           |                               |          |                  |          |                |                           |                               |          |  |  |  |  |
|                                                                                                                                                                                                      |           |                        |          |                                                    |             |         |           |                    |                           |                               |          |                  |          |                |                           |                               |          |  |  |  |  |
|                                                                                                                                                                                                      |           |                        |          |                                                    |             |         |           |                    |                           |                               |          |                  |          |                |                           |                               |          |  |  |  |  |
|                                                                                                                                                                                                      |           |                        |          |                                                    |             |         |           |                    |                           |                               |          |                  |          |                |                           |                               |          |  |  |  |  |
|                                                                                                                                                                                                      |           |                        |          |                                                    |             |         |           |                    |                           |                               |          |                  |          |                |                           |                               |          |  |  |  |  |
|                                                                                                                                                                                                      |           |                        |          |                                                    |             |         |           |                    |                           |                               |          |                  |          |                |                           |                               |          |  |  |  |  |
|                                                                                                                                                                                                      |           |                        |          |                                                    |             |         |           |                    |                           |                               |          |                  |          |                |                           |                               |          |  |  |  |  |
|                                                                                                                                                                                                      |           |                        |          |                                                    |             |         |           |                    |                           |                               |          |                  |          |                |                           |                               |          |  |  |  |  |
|                                                                                                                                                                                                      |           |                        |          |                                                    |             |         |           |                    |                           |                               |          |                  |          |                |                           |                               |          |  |  |  |  |
|                                                                                                                                                                                                      |           |                        |          |                                                    |             |         |           |                    |                           |                               |          |                  |          |                |                           |                               |          |  |  |  |  |
|                                                                                                                                                                                                      |           |                        |          |                                                    |             |         |           |                    |                           |                               |          |                  |          |                |                           |                               |          |  |  |  |  |
|                                                                                                                                                                                                      |           |                        |          |                                                    |             |         |           |                    |                           |                               |          |                  |          |                |                           |                               |          |  |  |  |  |
|                                                                                                                                                                                                      |           |                        |          |                                                    |             |         |           |                    |                           |                               |          |                  |          |                |                           |                               |          |  |  |  |  |
|                                                                                                                                                                                                      |           |                        |          |                                                    |             |         |           |                    |                           |                               |          |                  |          |                |                           |                               |          |  |  |  |  |
|                                                                                                                                                                                                      |           |                        |          |                                                    |             |         |           |                    |                           |                               |          |                  |          |                |                           |                               |          |  |  |  |  |
|                                                                                                                                                                                                      |           |                        |          |                                                    |             |         |           |                    |                           |                               |          |                  |          |                |                           |                               |          |  |  |  |  |
|                                                                                                                                                                                                      |           |                        |          |                                                    |             |         |           |                    |                           |                               |          |                  |          |                |                           |                               |          |  |  |  |  |
|                                                                                                                                                                                                      |           |                        |          |                                                    |             |         |           |                    |                           |                               |          |                  |          |                |                           |                               |          |  |  |  |  |
|                                                                                                                                                                                                      |           |                        |          |                                                    |             |         |           |                    |                           |                               |          |                  |          |                |                           |                               |          |  |  |  |  |
|                                                                                                                                                                                                      |           |                        |          |                                                    |             |         |           |                    |                           |                               |          |                  |          |                |                           |                               |          |  |  |  |  |
|                                                                                                                                                                                                      |           |                        |          |                                                    |             |         |           |                    |                           |                               |          |                  |          |                |                           |                               |          |  |  |  |  |
|                                                                                                                                                                                                      |           |                        |          |                                                    |             |         |           |                    |                           |                               |          |                  |          |                |                           |                               |          |  |  |  |  |
|                                                                                                                                                                                                      |           |                        |          |                                                    |             |         |           |                    |                           |                               |          |                  |          |                |                           |                               |          |  |  |  |  |
|                                                                                                                                                                                                      |           |                        |          |                                                    |             |         |           |                    |                           |                               |          |                  |          |                |                           |                               |          |  |  |  |  |
|                                                                                                                                                                                                      |           |                        |          |                                                    |             |         |           |                    |                           |                               |          |                  |          |                |                           |                               |          |  |  |  |  |
|                                                                                                                                                                                                      |           |                        |          |                                                    |             |         |           |                    |                           |                               |          |                  |          |                |                           |                               |          |  |  |  |  |
|                                                                                                                                                                                                      |           |                        |          |                                                    |             |         |           |                    |                           |                               |          |                  |          |                |                           |                               |          |  |  |  |  |
|                                                                                                                                                                                                      |           |                        |          |                                                    |             |         |           |                    |                           |                               |          |                  |          |                |                           |                               |          |  |  |  |  |
|                                                                                                                                                                                                      |           |                        |          |                                                    |             |         |           |                    |                           |                               |          |                  |          |                |                           |                               |          |  |  |  |  |
|                                                                                                                                                                                                      |           |                        |          |                                                    |             |         |           |                    |                           |                               |          |                  |          |                |                           |                               |          |  |  |  |  |
|                                                                                                                                                                                                      |           |                        |          |                                                    |             |         |           |                    |                           |                               |          |                  |          |                |                           |                               |          |  |  |  |  |
|                                                                                                                                                                                                      |           |                        |          |                                                    |             |         |           |                    |                           |                               |          |                  |          |                |                           |                               |          |  |  |  |  |
|                                                                                                                                                                                                      |           |                        |          |                                                    |             |         |           |                    |                           |                               |          |                  |          |                |                           |                               |          |  |  |  |  |
|                                                                                                                                                                                                      |           |                        |          |                                                    |             |         |           |                    |                           |                               |          |                  |          |                |                           |                               |          |  |  |  |  |
|                                                                                                                                                                                                      |           |                        |          |                                                    |             |         |           |                    |                           |                               |          |                  |          |                |                           |                               |          |  |  |  |  |
|                                                                                                                                                                                                      |           |                        |          |                                                    |             |         |           |                    |                           |                               |          |                  |          |                |                           |                               |          |  |  |  |  |
|                                                                                                                                                                                                      |           |                        |          |                                                    |             |         |           |                    |                           |                               |          |                  |          |                |                           |                               |          |  |  |  |  |
|                                                                                                                                                                                                      |           |                        |          |                                                    |             |         |           |                    |                           |                               |          |                  |          |                |                           |                               |          |  |  |  |  |
|                                                                                                                                                                                                      |           |                        |          |                                                    |             |         |           |                    |                           |                               |          |                  |          |                |                           |                               |          |  |  |  |  |
|                                                                                                                                                                                                      |           |                        |          |                                                    |             |         |           |                    |                           |                               |          |                  |          |                |                           |                               |          |  |  |  |  |
|                                                                                                                                                                                                      |           |                        |          |                                                    |             |         |           |                    |                           |                               |          |                  |          |                |                           |                               |          |  |  |  |  |
|                                                                                                                                                                                                      |           |                        |          |                                                    |             |         |           |                    |                           |                               |          |                  |          |                |                           |                               |          |  |  |  |  |
|                                                                                                                                                                                                      |           |                        |          |                                                    |             |         |           |                    |                           |                               |          |                  |          |                |                           |                               |          |  |  |  |  |
|                                                                                                                                                                                                      |           |                        |          |                                                    |             |         |           |                    |                           |                               |          |                  |          |                |                           |                               |          |  |  |  |  |
|                                                                                                                                                                                                      |           |                        |          |                                                    |             |         |           |                    |                           |                               |          |                  |          |                |                           |                               |          |  |  |  |  |
|                                                                                                                                                                                                      |           |                        |          |                                                    |             |         |           |                    |                           |                               |          |                  |          |                |                           |                               |          |  |  |  |  |
|                                                                                                                                                                                                      |           |                        |          |                                                    |             |         |           |                    |                           |                               |          |                  |          |                |                           |                               |          |  |  |  |  |
|                                                                                                                                                                                                      |           |                        |          |                                                    |             |         |           |                    |                           |                               |          |                  |          |                |                           |                               |          |  |  |  |  |
|                                                                                                                                                                                                      |           |                        |          |                                                    |             |         |           |                    |                           |                               |          |                  |          |                |                           |                               |          |  |  |  |  |
|                                                                                                                                                                                                      |           |                        |          |                                                    |             |         |           |                    |                           |                               |          |                  |          |                |                           |                               |          |  |  |  |  |
|                                                                                                                                                                                                      |           |                        |          |                                                    |             |         |           |                    |                           |                               |          |                  |          |                |                           |                               |          |  |  |  |  |
|                                                                                                                                                                                                      |           |                        |          |                                                    |             |         |           |                    |                           |                               |          |                  |          |                |                           |                               |          |  |  |  |  |
|                                                                                                                                                                                                      |           |                        |          |                                                    |             |         |           |                    |                           |                               |          |                  |          |                |                           |                               |          |  |  |  |  |
|                                                                                                                                                                                                      |           |                        |          |                                                    |             |         |           |                    |                           |                               |          |                  |          |                |                           |                               |          |  |  |  |  |
|                                                                                                                                                                                                      |           |                        |          |                                                    |             |         |           |                    |                           |                               |          |                  |          |                |                           |                               |          |  |  |  |  |
|                                                                                                                                                                                                      |           |                        |          |                                                    |             |         |           |                    |                           |                               |          |                  |          |                |                           |                               |          |  |  |  |  |
|                                                                                                                                                                                                      |           |                        |          |                                                    |             |         |           |                    |                           |                               |          |                  |          |                |                           |                               |          |  |  |  |  |
|                                                                                                                                                                                                      |           |                        |          |                                                    |             |         |           |                    |                           |                               |          |                  |          |                |                           |                               |          |  |  |  |  |
|                                                                                                                                                                                                      |           |                        |          |                                                    |             |         |           |                    |                           |                               |          |                  |          |                |                           |                               |          |  |  |  |  |
|                                                                                                                                                                                                      |           |                        |          |                                                    |             |         |           |                    |                           |                               |          |                  |          |                |                           |                               |          |  |  |  |  |
|                                                                                                                                                                                                      |           |                        |          |                                                    |             |         |           |                    |                           |                               |          |                  |          |                |                           |                               |          |  |  |  |  |
|                                                                                                                                                                                                      |           |                        |          |                                                    |             |         |           |                    |                           |                               |          |                  |          |                |                           |                               |          |  |  |  |  |
|                                                                                                                                                                                                      |           |                        |          |                                                    |             |         |           |                    |                           |                               |          |                  |          |                |                           |                               |          |  |  |  |  |
|                                                                                                                                                                                                      |           |                        |          |                                                    |             |         |           |                    |                           |                               |          |                  |          |                |                           |                               |          |  |  |  |  |
|                                                                                                                                                                                                      |           |                        |          |                                                    |             |         |           |                    |                           |                               |          |                  |          |                |                           |                               |          |  |  |  |  |
|                                                                                                                                                                                                      |           |                        |          |                                                    |             |         |           |                    |                           |                               |          |                  |          |                |                           |                               |          |  |  |  |  |
|                                                                                                                                                                                                      |           |                        |          |                                                    |             |         |           |                    |                           |                               |          |                  |          |                |                           |                               |          |  |  |  |  |
|                                                                                                                                                                                                      |           |                        |          |                                                    |             |         |           |                    |                           |                               |          |                  |          |                |                           |                               |          |  |  |  |  |
|                                                                                                                                                                                                      |           |                        |          |                                                    |             |         |           |                    |                           |                               |          |                  |          |                |                           |                               |          |  |  |  |  |
|                                                                                                                                                                                                      |           |                        |          |                                                    |             |         |           |                    |                           |                               |          |                  |          |                |                           |                               |          |  |  |  |  |
|                                                                                                                                                                                                      |           |                        |          |                                                    |             |         |           |                    |                           |                               |          |                  |          |                |                           |                               |          |  |  |  |  |
|                                                                                                                                                                                                      |           |                        |          |                                                    |             |         |           |                    |                           |                               |          |                  |          |                |                           |                               |          |  |  |  |  |
|                                                                                                                                                                                                      |           |                        |          |                                                    |             |         |           |                    |                           |                               |          |                  |          |                |                           |                               |          |  |  |  |  |
|                                                                                                                                                                                                      |           |                        |          |                                                    |             |         |           |                    |                           |                               |          |                  |          |                |                           |                               |          |  |  |  |  |
|                                                                                                                                                                                                      |           |                        |          |                                                    |             |         |           |                    |                           |                               |          |                  |          |                |                           |                               |          |  |  |  |  |
|                                                                                                                                                                                                      |           |                        |          |                                                    |             |         |           |                    |                           |                               |          |                  |          |                |                           |                               |          |  |  |  |  |
|                                                                                                                                                                                                      |           |                        |          |                                                    |             |         |           |                    |                           |                               |          |                  |          |                |                           |                               |          |  |  |  |  |
|                                                                                                                                                                                                      |           |                        |          |                                                    |             |         |           |                    |                           |                               |          |                  |          |                |                           |                               |          |  |  |  |  |
|                                                                                                                                                                                                      |           |                        |          |                                                    |             |         |           |                    |                           |                               |          |                  |          |                |                           |                               |          |  |  |  |  |
|                                                                                                                                                                                                      |           |                        |          |                                                    |             |         |           |                    |                           |                               |          |                  |          |                |                           |                               |          |  |  |  |  |
|                                                                                                                                                                                                      |           |                        |          |                                                    |             |         |           |                    |                           |                               |          |                  |          |                |                           |                               |          |  |  |  |  |
|                                                                                                                                                                                                      |           |                        |          |                                                    |             |         |           |                    |                           |                               |          |                  |          |                |                           |                               |          |  |  |  |  |
|                                                                                                                                                                                                      |           |                        |          |                                                    |             |         |           |                    |                           |                               |          |                  |          |                |                           |                               |          |  |  |  |  |
|                                                                                                                                                                                                      |           |                        |          |                                                    |             |         |           |                    |                           |                               |          |                  |          |                |                           |                               |          |  |  |  |  |
|                                                                                                                                                                                                      |           |                        |          |                                                    |             |         |           |                    |                           |                               |          |                  |          |                |                           |                               |          |  |  |  |  |
|                                                                                                                                                                                                      |           |                        |          |                                                    |             |         |           |                    |                           |                               |          |                  |          |                |                           |                               |          |  |  |  |  |
|                                                                                                                                                                                                      |           |                        |          |                                                    |             |         |           |                    |                           |                               |          |                  |          |                |                           |                               |          |  |  |  |  |
|                                                                                                                                                                                                      |           |                        |          |                                                    |             |         |           |                    |                           |                               |          |                  |          |                |                           |                               |          |  |  |  |  |
|                                                                                                                                                                                                      |           |                        |          |                                                    |             |         |           |                    |                           |                               |          |                  |          |                |                           |                               |          |  |  |  |  |
|                                                                                                                                                                                                      |           |                        |          |                                                    |             |         |           |                    |                           |                               |          |                  |          |                |                           |                               |          |  |  |  |  |
|                                                                                                                                                                                                      |           |                        |          |                                                    |             |         |           |                    |                           |                               |          |                  |          |                |                           |                               |          |  |  |  |  |
|                                                                                                                                                                                                      |           |                        |          |                                                    |             |         |           |                    |                           |                               |          |                  |          |                |                           |                               |          |  |  |  |  |
|                                                                                                                                                                                                      |           |                        |          |                                                    |             |         |           |                    |                           |                               |          |                  |          |                |                           |                               |          |  |  |  |  |
|                                                                                                                                                                                                      |           |                        |          |                                                    |             |         |           |                    |                           |                               |          |                  |          |                |                           |                               |          |  |  |  |  |
|                                                                                                                                                                                                      |           |                        |          |                                                    |             |         |           |                    |                           |                               |          |                  |          |                |                           |                               |          |  |  |  |  |



| Supplementary Information: Appendix 2                                                                   |           |        |          | Summary of Zero Pass Metrics Toolkit                                                                                                                                                                                                                                                                                                                                           |             |         |           |                  |                           |                               |          |                  |          |                |              |                               |          |
|---------------------------------------------------------------------------------------------------------|-----------|--------|----------|--------------------------------------------------------------------------------------------------------------------------------------------------------------------------------------------------------------------------------------------------------------------------------------------------------------------------------------------------------------------------------|-------------|---------|-----------|------------------|---------------------------|-------------------------------|----------|------------------|----------|----------------|--------------|-------------------------------|----------|
| Yield, conversion, selectivity, AE, RME                                                                 |           |        |          |                                                                                                                                                                                                                                                                                                                                                                                |             |         |           |                  |                           |                               |          |                  |          |                |              |                               |          |
| Reactant (Limiting Reactant First)                                                                      | Mass (mg) | MW     | Mol (mM) | Catalyst                                                                                                                                                                                                                                                                                                                                                                       | Mass (mol%) | Reagent | Mass (mg) | Reaction solvent | Volume (cm <sup>3</sup> ) | Density (g ml <sup>-1</sup> ) | Mass (g) | Work up chemical | Mass (g) | Workup solvent | Volume (cm3) | Density (g ml <sup>-1</sup> ) | Mass (g) |
| Benzaldehyde                                                                                            | 106.12    | 106.12 | 1.00     | Co                                                                                                                                                                                                                                                                                                                                                                             | 0.50        | H2O2    | 34.00     |                  |                           |                               | 0.00     |                  |          | Ethyl acetate  | 5.00         | 0.89                          | 4.45     |
| Pyridoline                                                                                              | 71.11     | 71.11  | 1.00     |                                                                                                                                                                                                                                                                                                                                                                                |             |         |           |                  |                           |                               | 0.00     |                  |          |                |              |                               | 0.00     |
|                                                                                                         |           |        |          |                                                                                                                                                                                                                                                                                                                                                                                |             |         |           |                  |                           |                               | 0.00     |                  |          |                |              |                               | 0.00     |
|                                                                                                         |           |        |          |                                                                                                                                                                                                                                                                                                                                                                                |             |         |           |                  |                           |                               | 0.00     |                  |          |                |              |                               | 0.00     |
|                                                                                                         |           |        |          |                                                                                                                                                                                                                                                                                                                                                                                |             |         |           |                  |                           |                               | 0.00     |                  |          |                |              |                               | 0.00     |
|                                                                                                         |           |        |          |                                                                                                                                                                                                                                                                                                                                                                                |             |         |           |                  |                           |                               | 0.00     |                  |          |                |              |                               | 0.00     |
|                                                                                                         |           |        |          |                                                                                                                                                                                                                                                                                                                                                                                |             |         |           |                  |                           |                               | 0.00     |                  |          |                |              |                               | 0.00     |
| Total                                                                                                   | 177.23    | 177.23 |          |                                                                                                                                                                                                                                                                                                                                                                                | 0.50        |         | 34.00     |                  |                           |                               | 0.00     |                  | 0.00     |                |              |                               | 4.45     |
| $AE = \frac{\text{molecular weight of product}}{\text{total molecular weight of reactants}} \times 100$ |           |        |          |                                                                                                                                                                                                                                                                                                                                                                                |             |         |           | Flag             |                           |                               |          |                  |          |                |              |                               |          |
|                                                                                                         |           |        |          |                                                                                                                                                                                                                                                                                                                                                                                |             |         |           | Yield            | 95.9                      | 95.9                          |          |                  |          |                |              |                               |          |
|                                                                                                         |           |        |          |                                                                                                                                                                                                                                                                                                                                                                                |             |         |           | Conversion       | 100.0                     | 100.0                         |          |                  |          |                |              |                               |          |
|                                                                                                         |           |        |          |                                                                                                                                                                                                                                                                                                                                                                                |             |         |           | Selectivity      | 95.9                      | 95.9                          |          |                  |          |                |              |                               |          |
| $RME = \frac{\text{mass of isolated product}}{\text{total mass of reactants}} \times 100$               |           |        |          |                                                                                                                                                                                                                                                                                                                                                                                |             |         |           | AE               | 98.9                      |                               |          |                  |          |                |              |                               |          |
|                                                                                                         |           |        |          |                                                                                                                                                                                                                                                                                                                                                                                |             |         |           | RME              | 94.5                      |                               |          |                  |          |                |              |                               |          |
| Solvents (Zero Pass)                                                                                    |           |        |          |                                                                                                                                                                                                                                                                                                                                                                                |             |         |           |                  |                           |                               |          |                  |          |                |              |                               |          |
| Highly hazardous solvents (Red flag for any of the following)                                           |           |        |          | List Highly Hazardous Solvents Below                                                                                                                                                                                                                                                                                                                                           |             |         |           |                  |                           |                               |          |                  |          |                |              |                               |          |
| Et <sub>2</sub> O, Benzene, CCl <sub>4</sub> , chloroform, DCE, nitromethane, CS <sub>2</sub> , HMPA    |           |        |          | None                                                                                                                                                                                                                                                                                                                                                                           |             |         |           |                  |                           |                               |          |                  |          |                |              |                               |          |
| Health and Safety (Zero Pass)                                                                           |           |        |          |                                                                                                                                                                                                                                                                                                                                                                                |             |         |           |                  |                           |                               |          |                  |          |                |              |                               |          |
| Health & safety (Red flag for any of the following)                                                     |           |        |          | List substances plus the red flagged H-codes below                                                                                                                                                                                                                                                                                                                             |             |         |           |                  |                           |                               |          |                  |          |                |              |                               |          |
| Highly explosive                                                                                        |           |        |          | H200, H201, H202, H203                                                                                                                                                                                                                                                                                                                                                         |             |         |           | None             |                           |                               |          |                  |          |                |              |                               |          |
| Explosive thermal runaway                                                                               |           |        |          | H240                                                                                                                                                                                                                                                                                                                                                                           |             |         |           | None             |                           |                               |          |                  |          |                |              |                               |          |
| Fatally toxic                                                                                           |           |        |          | H300, H310, H330                                                                                                                                                                                                                                                                                                                                                               |             |         |           | None             |                           |                               |          |                  |          |                |              |                               |          |
| Mutagenic                                                                                               |           |        |          | H350                                                                                                                                                                                                                                                                                                                                                                           |             |         |           | None             |                           |                               |          |                  |          |                |              |                               |          |
| Repro-toxic                                                                                             |           |        |          | H360                                                                                                                                                                                                                                                                                                                                                                           |             |         |           | None             |                           |                               |          |                  |          |                |              |                               |          |
| Serious environmental implications                                                                      |           |        |          | H420                                                                                                                                                                                                                                                                                                                                                                           |             |         |           | None             |                           |                               |          |                  |          |                |              |                               |          |
|                                                                                                         |           |        |          | <div>Instructions for use: Enter your data into the tables above to automatically calculate yield, AE and RME. Use the blank boxes in the tables to enter experimental data and note the flags for each Key Parameter.</div> <div>Printing tips: This spreadsheet is designed to be printed with 'landscape', 'narrow margin' and 'fit all columns on one page' settings</div> |             |         |           |                  |                           |                               |          |                  |          |                |              |                               |          |

**Fig. S32.** Reference 29: Zero Pass CHEM21 green metrics toolkit.

**Fig. S32.** Reference 29: Zero Pass CHEM21 green metrics toolkit.



| Supplementary Information: Appendix 2                                                                                                                                                                                                                                                                                                                       |           |        |          | Summary of Zero Pass Metrics Toolkit |             |                                                    |           |                                      |                           |                               |          |                                                                                                                  |          |                |              |                               |          |
|-------------------------------------------------------------------------------------------------------------------------------------------------------------------------------------------------------------------------------------------------------------------------------------------------------------------------------------------------------------|-----------|--------|----------|--------------------------------------|-------------|----------------------------------------------------|-----------|--------------------------------------|---------------------------|-------------------------------|----------|------------------------------------------------------------------------------------------------------------------|----------|----------------|--------------|-------------------------------|----------|
| Yield, conversion, selectivity, AE, RME                                                                                                                                                                                                                                                                                                                     |           |        |          |                                      |             |                                                    |           |                                      |                           |                               |          |                                                                                                                  |          |                |              |                               |          |
| Reactant (Limiting Reactant First)                                                                                                                                                                                                                                                                                                                          | Mass (mg) | MW     | Mol (mM) | Catalyst                             | Mass (mol%) | Reagent                                            | Mass (mg) | Reaction solvent                     | Volume (cm <sup>3</sup> ) | Density (g ml <sup>-1</sup> ) | Mass (g) | Work up chemical                                                                                                 | Mass (g) | Workup solvent | Volume (cm3) | Density (g ml <sup>-1</sup> ) | Mass (g) |
| Benzaldehyde                                                                                                                                                                                                                                                                                                                                                | 106.12    | 106.12 | 1.00     | Ni                                   | 1.00        | TBHP                                               | 90.12     | Dioxane                              | 1.00                      | 1.03                          | 1.03     |                                                                                                                  |          | Ethyl acetate  | 5.00         | 0.89                          | 4.45     |
| Piperidine                                                                                                                                                                                                                                                                                                                                                  | 85.15     | 85.15  | 1.00     |                                      |             |                                                    |           |                                      |                           |                               | 0.00     |                                                                                                                  |          |                |              |                               | 0.00     |
|                                                                                                                                                                                                                                                                                                                                                             |           |        |          |                                      |             |                                                    |           |                                      |                           |                               | 0.00     |                                                                                                                  |          |                |              |                               | 0.00     |
|                                                                                                                                                                                                                                                                                                                                                             |           |        |          |                                      |             |                                                    |           |                                      |                           |                               | 0.00     |                                                                                                                  |          |                |              |                               | 0.00     |
|                                                                                                                                                                                                                                                                                                                                                             |           |        |          |                                      |             |                                                    |           |                                      |                           |                               | 0.00     |                                                                                                                  |          |                |              |                               | 0.00     |
|                                                                                                                                                                                                                                                                                                                                                             |           |        |          |                                      |             |                                                    |           |                                      |                           |                               | 0.00     |                                                                                                                  |          |                |              |                               | 0.00     |
|                                                                                                                                                                                                                                                                                                                                                             |           |        |          |                                      |             |                                                    |           |                                      |                           |                               | 0.00     |                                                                                                                  |          |                |              |                               | 0.00     |
| Total                                                                                                                                                                                                                                                                                                                                                       | 191.27    | 191.27 |          |                                      | 1.00        |                                                    | 90.12     |                                      |                           |                               | 1.03     |                                                                                                                  | 0.00     |                |              |                               | 4.45     |
| $AE = \frac{\text{molecular weight of product}}{\text{total molecular weight of reactants}} \times 100$                                                                                                                                                                                                                                                     |           |        |          |                                      |             | Yield                                              | 97.8      | Flag                                 | 97.8                      |                               |          |                                                                                                                  |          |                |              |                               |          |
|                                                                                                                                                                                                                                                                                                                                                             |           |        |          |                                      |             | Conversion                                         | 100.0     |                                      | 100.0                     |                               |          |                                                                                                                  |          |                |              |                               |          |
|                                                                                                                                                                                                                                                                                                                                                             |           |        |          |                                      |             | Selectivity                                        | 97.8      |                                      | 97.8                      |                               |          |                                                                                                                  |          |                |              |                               |          |
| $RME = \frac{\text{mass of isolated product}}{\text{total mass of reactants}} \times 100$                                                                                                                                                                                                                                                                   |           |        |          |                                      |             | AE                                                 | 98.9      |                                      |                           |                               |          |                                                                                                                  |          |                |              |                               |          |
|                                                                                                                                                                                                                                                                                                                                                             |           |        |          |                                      |             | RME                                                | 96.7      |                                      |                           |                               |          |                                                                                                                  |          |                |              |                               |          |
| Solvents (Zero Pass)                                                                                                                                                                                                                                                                                                                                        |           |        |          |                                      |             |                                                    |           |                                      |                           |                               |          |                                                                                                                  |          |                |              |                               |          |
| Highly hazardous solvents (Red flag for any of the following)                                                                                                                                                                                                                                                                                               |           |        |          |                                      |             |                                                    |           | List Highly Hazardous Solvents Below |                           |                               |          |                                                                                                                  |          |                |              |                               |          |
| Et <sub>2</sub> O, Benzene, CCl <sub>4</sub> , chloroform, DCE, nitromethane, CS <sub>2</sub> , HMPA                                                                                                                                                                                                                                                        |           |        |          |                                      |             |                                                    |           | None                                 |                           |                               |          |                                                                                                                  |          |                |              |                               |          |
| Health and Safety (Zero Pass)                                                                                                                                                                                                                                                                                                                               |           |        |          |                                      |             |                                                    |           |                                      |                           |                               |          |                                                                                                                  |          |                |              |                               |          |
| Health & safety (Red flag for any of the following)                                                                                                                                                                                                                                                                                                         |           |        |          |                                      |             | List substances plus the red flagged H-codes below |           |                                      |                           |                               |          |                                                                                                                  |          |                |              |                               |          |
| Highly explosive                                                                                                                                                                                                                                                                                                                                            |           |        |          | H200, H201, H202, H203               |             |                                                    |           | None                                 |                           |                               |          |                                                                                                                  |          |                |              |                               |          |
| Explosive thermal runaway                                                                                                                                                                                                                                                                                                                                   |           |        |          | H240                                 |             |                                                    |           | None                                 |                           |                               |          |                                                                                                                  |          |                |              |                               |          |
| Fatally toxic                                                                                                                                                                                                                                                                                                                                               |           |        |          | H300, H310, H330                     |             |                                                    |           | None                                 |                           |                               |          |                                                                                                                  |          |                |              |                               |          |
| Mutagenic                                                                                                                                                                                                                                                                                                                                                   |           |        |          | H350                                 |             |                                                    |           | None                                 |                           |                               |          |                                                                                                                  |          |                |              |                               |          |
| Repro-toxic                                                                                                                                                                                                                                                                                                                                                 |           |        |          | H360                                 |             |                                                    |           | None                                 |                           |                               |          |                                                                                                                  |          |                |              |                               |          |
| Serious environmental implications                                                                                                                                                                                                                                                                                                                          |           |        |          | H420                                 |             |                                                    |           | None                                 |                           |                               |          |                                                                                                                  |          |                |              |                               |          |
|                                                                                                                                                                                                                                                                                                                                                             |           |        |          |                                      |             |                                                    |           |                                      |                           |                               |          | mass (mg)    mw    mol (mM)<br>Product    185.000    189.258    0.9775016<br>mass<br>Unreacted limiting reactant |          |                |              |                               |          |
| Instructions for use: Enter your data into the tables above to automatically calculate yield, AE and RME. Use the blank boxes in the tables to enter experimental data and note the flags for each Key Parameter.<br>Printing tips: This spreadsheet is designed to be printed with 'landscape', 'narrow margin' and 'fit all columns on one page' settings |           |        |          |                                      |             |                                                    |           |                                      |                           |                               |          |                                                                                                                  |          |                |              |                               |          |

Fig. S34. Reference 30: Zero Pass CHEM21 green metrics toolkit.

**Fig. S34.** Reference 30: Zero Pass CHEM21 green metrics toolkit.

| Supplementary Information: Appendix 2 |           |        |          |          |             |         |           |                  |                           | Summary of First Pass Metrics Toolkit |          |                  |          |                |              |                               |          |  |  |
|---------------------------------------|-----------|--------|----------|----------|-------------|---------|-----------|------------------|---------------------------|---------------------------------------|----------|------------------|----------|----------------|--------------|-------------------------------|----------|--|--|
| Yield, AE, RME, MI/PMI and OE         |           |        |          |          |             |         |           |                  |                           |                                       |          |                  |          |                |              |                               |          |  |  |
| Reactant (Limiting Reactant First)    | Mass (mg) | MW     | Mol (mM) | Catalyst | Mass (mol%) | Reagent | Mass (mg) | Reaction solvent | Volume (cm <sup>3</sup> ) | Density (g ml <sup>-1</sup> )         | Mass (g) | Work up chemical | Mass (g) | Workup solvent | Volume (cm3) | Density (g ml <sup>-1</sup> ) | Mass (g) |  |  |
| Benzaldehyde                          | 106.12    | 106.12 | 1.00     | Ni       | 1.00        | TBHP    | 90.12     | Dioxane          | 1.00                      | 1.03                                  | 1.03     |                  |          | ethyl acetate  | 5.00         | 0.89                          | 4.45     |  |  |
| Piperidine                            | 85.15     | 85.15  | 1.00     |          |             |         |           |                  |                           |                                       | 0.00     |                  |          |                |              |                               | 0.00     |  |  |
|                                       |           |        |          |          |             |         |           |                  |                           |                                       | 0.00     |                  |          |                |              |                               | 0.00     |  |  |
|                                       |           |        |          |          |             |         |           |                  |                           |                                       | 0.00     |                  |          |                |              |                               | 0.00     |  |  |
|                                       |           |        |          |          |             |         |           |                  |                           |                                       | 0.00     |                  |          |                |              |                               | 0.00     |  |  |
|                                       |           |        |          |          |             |         |           |                  |                           |                                       | 0.00     |                  |          |                |              |                               | 0.00     |  |  |
|                                       |           |        |          |          |             |         |           |                  |                           |                                       | 0.00     |                  |          |                |              |                               | 0.00     |  |  |
| Total                                 | 191.27    | 191.27 |          |          | 1.00        |         | 90.12     |                  |                           |                                       | 1.03     |                  | 0.00     |                |              |                               | 4.45     |  |  |
|                                       |           |        |          |          |             |         |           |                  |                           | Flag                                  |          |                  |          |                |              |                               |          |  |  |
|                                       |           |        |          |          |             |         |           |                  |                           | Yield                                 |          | 97.8             |          |                |              |                               |          |  |  |
|                                       |           |        |          |          |             |         |           |                  |                           | Conversion                            |          | 100.0            |          |                |              |                               |          |  |  |
|                                       |           |        |          |          |             |         |           |                  |                           | Selectivity                           |          | 97.8             |          |                |              |                               |          |  |  |
|                                       |           |        |          |          |             |         |           |                  |                           | AE                                    |          | 98.9             |          |                |              |                               |          |  |  |
|                                       |           |        |          |          |             |         |           |                  |                           | RME                                   |          | 96.7             |          |                |              |                               |          |  |  |
|                                       |           |        |          |          |             |         |           |                  |                           | PMI total                             |          | 1.6              |          |                |              |                               |          |  |  |
|                                       |           |        |          |          |             |         |           |                  |                           | PMI Reaction                          |          | 1.5              |          |                |              |                               |          |  |  |
|                                       |           |        |          |          |             |         |           |                  |                           | PMI reactants, reagents, catalyst     |          | 1.5              |          |                |              |                               |          |  |  |
|                                       |           |        |          |          |             |         |           |                  |                           | PMI reaction solvents                 |          | 0.0              |          |                |              |                               |          |  |  |
|                                       |           |        |          |          |             |         |           |                  |                           | PMI Workup                            |          | 0.0              |          |                |              |                               |          |  |  |
|                                       |           |        |          |          |             |         |           |                  |                           | PMI Workup chemical                   |          | 0.0              |          |                |              |                               |          |  |  |
|                                       |           |        |          |          |             |         |           |                  |                           | PMI workup solvents                   |          | 0.0              |          |                |              |                               |          |  |  |
|                                       |           |        |          |          |             |         |           |                  |                           |                                       |          |                  |          |                |              |                               |          |  |  |
|                                       |           |        |          |          |             |         |           |                  |                           |                                       |          |                  |          |                |              |                               |          |  |  |
|                                       |           |        |          |          |             |         |           |                  |                           |                                       |          |                  |          |                |              |                               |          |  |  |
|                                       |           |        |          |          |             |         |           |                  |                           |                                       |          |                  |          |                |              |                               |          |  |  |
|                                       |           |        |          |          |             |         |           |                  |                           |                                       |          |                  |          |                |              |                               |          |  |  |
|                                       |           |        |          |          |             |         |           |                  |                           |                                       |          |                  |          |                |              |                               |          |  |  |
|                                       |           |        |          |          |             |         |           |                  |                           |                                       |          |                  |          |                |              |                               |          |  |  |
|                                       |           |        |          |          |             |         |           |                  |                           |                                       |          |                  |          |                |              |                               |          |  |  |
|                                       |           |        |          |          |             |         |           |                  |                           |                                       |          |                  |          |                |              |                               |          |  |  |
|                                       |           |        |          |          |             |         |           |                  |                           |                                       |          |                  |          |                |              |                               |          |  |  |
|                                       |           |        |          |          |             |         |           |                  |                           |                                       |          |                  |          |                |              |                               |          |  |  |
|                                       |           |        |          |          |             |         |           |                  |                           |                                       |          |                  |          |                |              |                               |          |  |  |
|                                       |           |        |          |          |             |         |           |                  |                           |                                       |          |                  |          |                |              |                               |          |  |  |
|                                       |           |        |          |          |             |         |           |                  |                           |                                       |          |                  |          |                |              |                               |          |  |  |
|                                       |           |        |          |          |             |         |           |                  |                           |                                       |          |                  |          |                |              |                               |          |  |  |
|                                       |           |        |          |          |             |         |           |                  |                           |                                       |          |                  |          |                |              |                               |          |  |  |
|                                       |           |        |          |          |             |         |           |                  |                           |                                       |          |                  |          |                |              |                               |          |  |  |
|                                       |           |        |          |          |             |         |           |                  |                           |                                       |          |                  |          |                |              |                               |          |  |  |
|                                       |           |        |          |          |             |         |           |                  |                           |                                       |          |                  |          |                |              |                               |          |  |  |
|                                       |           |        |          |          |             |         |           |                  |                           |                                       |          |                  |          |                |              |                               |          |  |  |
|                                       |           |        |          |          |             |         |           |                  |                           |                                       |          |                  |          |                |              |                               |          |  |  |
|                                       |           |        |          |          |             |         |           |                  |                           |                                       |          |                  |          |                |              |                               |          |  |  |
|                                       |           |        |          |          |             |         |           |                  |                           |                                       |          |                  |          |                |              |                               |          |  |  |
|                                       |           |        |          |          |             |         |           |                  |                           |                                       |          |                  |          |                |              |                               |          |  |  |
|                                       |           |        |          |          |             |         |           |                  |                           |                                       |          |                  |          |                |              |                               |          |  |  |
|                                       |           |        |          |          |             |         |           |                  |                           |                                       |          |                  |          |                |              |                               |          |  |  |
|                                       |           |        |          |          |             |         |           |                  |                           |                                       |          |                  |          |                |              |                               |          |  |  |
|                                       |           |        |          |          |             |         |           |                  |                           |                                       |          |                  |          |                |              |                               |          |  |  |
|                                       |           |        |          |          |             |         |           |                  |                           |                                       |          |                  |          |                |              |                               |          |  |  |
|                                       |           |        |          |          |             |         |           |                  |                           |                                       |          |                  |          |                |              |                               |          |  |  |
|                                       |           |        |          |          |             |         |           |                  |                           |                                       |          |                  |          |                |              |                               |          |  |  |
|                                       |           |        |          |          |             |         |           |                  |                           |                                       |          |                  |          |                |              |                               |          |  |  |
|                                       |           |        |          |          |             |         |           |                  |                           |                                       |          |                  |          |                |              |                               |          |  |  |
|                                       |           |        |          |          |             |         |           |                  |                           |                                       |          |                  |          |                |              |                               |          |  |  |
|                                       |           |        |          |          |             |         |           |                  |                           |                                       |          |                  |          |                |              |                               |          |  |  |
|                                       |           |        |          |          |             |         |           |                  |                           |                                       |          |                  |          |                |              |                               |          |  |  |
|                                       |           |        |          |          |             |         |           |                  |                           |                                       |          |                  |          |                |              |                               |          |  |  |
|                                       |           |        |          |          |             |         |           |                  |                           |                                       |          |                  |          |                |              |                               |          |  |  |
|                                       |           |        |          |          |             |         |           |                  |                           |                                       |          |                  |          |                |              |                               |          |  |  |
|                                       |           |        |          |          |             |         |           |                  |                           |                                       |          |                  |          |                |              |                               |          |  |  |
|                                       |           |        |          |          |             |         |           |                  |                           |                                       |          |                  |          |                |              |                               |          |  |  |
|                                       |           |        |          |          |             |         |           |                  |                           |                                       |          |                  |          |                |              |                               |          |  |  |
|                                       |           |        |          |          |             |         |           |                  |                           |                                       |          |                  |          |                |              |                               |          |  |  |
|                                       |           |        |          |          |             |         |           |                  |                           |                                       |          |                  |          |                |              |                               |          |  |  |
|                                       |           |        |          |          |             |         |           |                  |                           |                                       |          |                  |          |                |              |                               |          |  |  |
|                                       |           |        |          |          |             |         |           |                  |                           |                                       |          |                  |          |                |              |                               |          |  |  |
|                                       |           |        |          |          |             |         |           |                  |                           |                                       |          |                  |          |                |              |                               |          |  |  |
|                                       |           |        |          |          |             |         |           |                  |                           |                                       |          |                  |          |                |              |                               |          |  |  |
|                                       |           |        |          |          |             |         |           |                  |                           |                                       |          |                  |          |                |              |                               |          |  |  |
|                                       |           |        |          |          |             |         |           |                  |                           |                                       |          |                  |          |                |              |                               |          |  |  |
|                                       |           |        |          |          |             |         |           |                  |                           |                                       |          |                  |          |                |              |                               |          |  |  |
|                                       |           |        |          |          |             |         |           |                  |                           |                                       |          |                  |          |                |              |                               |          |  |  |
|                                       |           |        |          |          |             |         |           |                  |                           |                                       |          |                  |          |                |              |                               |          |  |  |
|                                       |           |        |          |          |             |         |           |                  |                           |                                       |          |                  |          |                |              |                               |          |  |  |
|                                       |           |        |          |          |             |         |           |                  |                           |                                       |          |                  |          |                |              |                               |          |  |  |
|                                       |           |        |          |          |             |         |           |                  |                           |                                       |          |                  |          |                |              |                               |          |  |  |
|                                       |           |        |          |          |             |         |           |                  |                           |                                       |          |                  |          |                |              |                               |          |  |  |
|                                       |           |        |          |          |             |         |           |                  |                           |                                       |          |                  |          |                |              |                               |          |  |  |
|                                       |           |        |          |          |             |         |           |                  |                           |                                       |          |                  |          |                |              |                               |          |  |  |
|                                       |           |        |          |          |             |         |           |                  |                           |                                       |          |                  |          |                |              |                               |          |  |  |
|                                       |           |        |          |          |             |         |           |                  |                           |                                       |          |                  |          |                |              |                               |          |  |  |
|                                       |           |        |          |          |             |         |           |                  |                           |                                       |          |                  |          |                |              |                               |          |  |  |
|                                       |           |        |          |          |             |         |           |                  |                           |                                       |          |                  |          |                |              |                               |          |  |  |
|                                       |           |        |          |          |             |         |           |                  |                           |                                       |          |                  |          |                |              |                               |          |  |  |
|                                       |           |        |          |          |             |         |           |                  |                           |                                       |          |                  |          |                |              |                               |          |  |  |
|                                       |           |        |          |          |             |         |           |                  |                           |                                       |          |                  |          |                |              |                               |          |  |  |
|                                       |           |        |          |          |             |         |           |                  |                           |                                       |          |                  |          |                |              |                               |          |  |  |
|                                       |           |        |          |          |             |         |           |                  |                           |                                       |          |                  |          |                |              |                               |          |  |  |
|                                       |           |        |          |          |             |         |           |                  |                           |                                       |          |                  |          |                |              |                               |          |  |  |
|                                       |           |        |          |          |             |         |           |                  |                           |                                       |          |                  |          |                |              |                               |          |  |  |
|                                       |           |        |          |          |             |         |           |                  |                           |                                       |          |                  |          |                |              |                               |          |  |  |
|                                       |           |        |          |          |             |         |           |                  |                           |                                       |          |                  |          |                |              |                               |          |  |  |
|                                       |           |        |          |          |             |         |           |                  |                           |                                       |          |                  |          |                |              |                               |          |  |  |
|                                       |           |        |          |          |             |         |           |                  |                           |                                       |          |                  |          |                |              |                               |          |  |  |
|                                       |           |        |          |          |             |         |           |                  |                           |                                       |          |                  |          |                |              |                               |          |  |  |
|                                       |           |        |          |          |             |         |           |                  |                           |                                       |          |                  |          |                |              |                               |          |  |  |
|                                       |           |        |          |          |             |         |           |                  |                           |                                       |          |                  |          |                |              |                               |          |  |  |
|                                       |           |        |          |          |             |         |           |                  |                           |                                       |          |                  |          |                |              |                               |          |  |  |
|                                       |           |        |          |          |             |         |           |                  |                           |                                       |          |                  |          |                |              |                               |          |  |  |
|                                       |           |        |          |          |             |         |           |                  |                           |                                       |          |                  |          |                |              |                               |          |  |  |
|                                       |           |        |          |          |             |         |           |                  |                           |                                       |          |                  |          |                |              |                               |          |  |  |
|                                       |           |        |          |          |             |         |           |                  |                           |                                       |          |                  |          |                |              |                               |          |  |  |
|                                       |           |        |          |          |             |         |           |                  |                           |                                       |          |                  |          |                |              |                               |          |  |  |
|                                       |           |        |          |          |             |         |           |                  |                           |                                       |          |                  |          |                |              |                               |          |  |  |
|                                       |           |        |          |          |             |         |           |                  |                           |                                       |          |                  |          |                |              |                               |          |  |  |
|                                       |           |        |          |          |             |         |           |                  |                           |                                       |          |                  |          |                |              |                               |          |  |  |
|                                       |           |        |          |          |             |         |           |                  |                           |                                       |          |                  |          |                |              |                               |          |  |  |
|                                       |           |        |          |          |             |         |           |                  |                           |                                       |          |                  |          |                |              |                               |          |  |  |
|                                       |           |        |          |          |             |         |           |                  |                           |                                       |          |                  |          |                |              |                               |          |  |  |
|                                       |           |        |          |          |             |         |           |                  |                           |                                       |          |                  |          |                |              |                               |          |  |  |
|                                       |           |        |          |          |             |         |           |                  |                           |                                       |          |                  |          |                |              |                               |          |  |  |
|                                       |           |        |          |          |             |         |           |                  |                           |                                       |          |                  |          |                |              |                               |          |  |  |
|                                       |           |        |          |          |             |         |           |                  |                           |                                       |          |                  |          |                |              |                               |          |  |  |
|                                       |           |        |          |          |             |         |           |                  |                           |                                       |          |                  |          |                |              |                               |          |  |  |
|                                       |           |        |          |          |             |         |           |                  |                           |                                       |          |                  |          |                |              |                               |          |  |  |
|                                       |           |        |          |          |             |         |           |                  |                           |                                       |          |                  |          |                |              |                               |          |  |  |
|                                       |           |        |          |          |             |         |           |                  |                           |                                       |          |                  |          |                |              |                               |          |  |  |
|                                       |           |        |          |          |             |         |           |                  |                           |                                       |          |                  |          |                |              |                               |          |  |  |
|                                       |           |        |          |          |             |         |           |                  |                           |                                       |          |                  |          |                |              |                               |          |  |  |
|                                       |           |        |          |          |             |         |           |                  |                           |                                       |          |                  |          |                |              |                               |          |  |  |
|                                       |           |        |          |          |             |         |           |                  |                           |                                       |          |                  |          |                |              |                               |          |  |  |
|                                       |           |        |          |          |             |         |           |                  |                           |                                       |          |                  |          |                |              |                               |          |  |  |
|                                       |           |        |          |          |             |         |           |                  |                           |                                       |          |                  |          |                |              |                               |          |  |  |
|                                       |           |        |          |          |             |         |           |                  |                           |                                       |          |                  |          |                |              |                               |          |  |  |
|                                       |           |        |          |          |             |         |           |                  |                           |                                       |          |                  |          |                |              |                               |          |  |  |
|                                       |           |        |          |          |             |         |           |                  |                           |                                       |          |                  |          |                |              |                               |          |  |  |
|                                       |           |        |          |          |             |         |           |                  |                           |                                       |          |                  |          |                |              |                               |          |  |  |
|                                       |           |        |          |          |             |         |           |                  |                           |                                       |          |                  |          |                |              |                               |          |  |  |
|                                       |           |        |          |          |             |         |           |                  |                           |                                       |          |                  |          |                |              |                               |          |  |  |
|                                       |           |        |          |          |             |         |           |                  |                           |                                       |          |                  |          |                |              |                               |          |  |  |
|                                       |           |        |          |          |             |         |           |                  |                           |                                       |          |                  |          |                |              |                               |          |  |  |
|                                       |           |        |          |          |             |         |           |                  |                           |                                       |          |                  |          |                |              |                               |          |  |  |
|                                       |           |        |          |          |             |         |           |                  |                           |                                       |          |                  |          |                |              |                               |          |  |  |
|                                       |           |        |          |          |             |         |           |                  |                           |                                       |          |                  |          |                |              |                               |          |  |  |
|                                       |           |        |          |          |             |         |           |                  |                           |                                       |          |                  |          |                |              |                               |          |  |  |
|                                       |           |        |          |          |             |         |           |                  |                           |                                       |          |                  |          |                |              |                               |          |  |  |
|                                       |           |        |          |          |             |         |           |                  |                           |                                       |          |                  |          |                |              |                               |          |  |  |
|                                       |           |        |          |          |             |         |           |                  |                           |                                       |          |                  |          |                |              |                               |          |  |  |
|                                       |           |        |          |          |             |         |           |                  |                           |                                       |          |                  |          |                |              |                               |          |  |  |
|                                       |           |        |          |          |             |         |           |                  |                           |                                       |          |                  |          |                |              |                               |          |  |  |
|                                       |           |        |          |          |             |         |           |                  |                           |                                       |          |                  |          |                |              |                               |          |  |  |
|                                       |           |        |          |          |             |         |           |                  |                           |                                       |          |                  |          |                |              |                               |          |  |  |
|                                       |           |        |          |          |             |         |           |                  |                           |                                       |          |                  |          |                |              |                               |          |  |  |

| Supplementary Information: Appendix 2                                                                   |           |        |          | Summary of Zero Pass Metrics Toolkit |             |         |           |                                                    |                           |                               |          |                                                                                                                                                                                                                                                                                                                                                                         |          |                |              |                               |          |  |
|---------------------------------------------------------------------------------------------------------|-----------|--------|----------|--------------------------------------|-------------|---------|-----------|----------------------------------------------------|---------------------------|-------------------------------|----------|-------------------------------------------------------------------------------------------------------------------------------------------------------------------------------------------------------------------------------------------------------------------------------------------------------------------------------------------------------------------------|----------|----------------|--------------|-------------------------------|----------|--|
| Yield, conversion, selectivity, AE, RME                                                                 |           |        |          |                                      |             |         |           |                                                    |                           |                               |          |                                                                                                                                                                                                                                                                                                                                                                         |          |                |              |                               |          |  |
| Reactant (Limiting Reactant First)                                                                      | Mass (mg) | MW     | Mol (mM) | Catalyst                             | Mass (mol%) | Reagent | Mass (mg) | Reaction solvent                                   | Volume (cm <sup>3</sup> ) | Density (g ml <sup>-1</sup> ) | Mass (g) | Work up chemical                                                                                                                                                                                                                                                                                                                                                        | Mass (g) | Workup solvent | Volume (cm3) | Density (g ml <sup>-1</sup> ) | Mass (g) |  |
| Benzaldehyde                                                                                            | 106.12    | 106.12 | 1.00     | Ni                                   | 1.00        | TBHP    | 90.12     | THF                                                | 3.00                      | 0.89                          | 2.67     |                                                                                                                                                                                                                                                                                                                                                                         |          | Ethyl acetate  | 5.00         | 0.89                          | 4.45     |  |
| Morpholine                                                                                              | 87.1      | 87.10  | 1.00     |                                      |             |         |           |                                                    |                           |                               | 0.00     |                                                                                                                                                                                                                                                                                                                                                                         |          |                |              |                               | 0.00     |  |
|                                                                                                         |           |        |          |                                      |             |         |           |                                                    |                           |                               | 0.00     |                                                                                                                                                                                                                                                                                                                                                                         |          |                |              |                               | 0.00     |  |
|                                                                                                         |           |        |          |                                      |             |         |           |                                                    |                           |                               | 0.00     |                                                                                                                                                                                                                                                                                                                                                                         |          |                |              |                               | 0.00     |  |
|                                                                                                         |           |        |          |                                      |             |         |           |                                                    |                           |                               | 0.00     |                                                                                                                                                                                                                                                                                                                                                                         |          |                |              |                               | 0.00     |  |
|                                                                                                         |           |        |          |                                      |             |         |           |                                                    |                           |                               | 0.00     |                                                                                                                                                                                                                                                                                                                                                                         |          |                |              |                               | 0.00     |  |
|                                                                                                         |           |        |          |                                      |             |         |           |                                                    |                           |                               | 0.00     |                                                                                                                                                                                                                                                                                                                                                                         |          |                |              |                               | 0.00     |  |
| Total                                                                                                   | 193.22    | 193.22 |          |                                      | 1.00        |         | 90.12     |                                                    |                           |                               | 2.67     |                                                                                                                                                                                                                                                                                                                                                                         | 0.00     |                |              |                               | 4.45     |  |
| $AE = \frac{\text{molecular weight of product}}{\text{total molecular weight of reactants}} \times 100$ |           |        |          |                                      |             |         |           | Flag                                               |                           |                               |          |                                                                                                                                                                                                                                                                                                                                                                         |          |                |              |                               |          |  |
|                                                                                                         |           |        |          |                                      |             |         |           | Yield 98.8                                         |                           |                               |          |                                                                                                                                                                                                                                                                                                                                                                         |          |                |              |                               |          |  |
|                                                                                                         |           |        |          |                                      |             |         |           | Conversion 100.0                                   |                           |                               |          |                                                                                                                                                                                                                                                                                                                                                                         |          |                |              |                               |          |  |
|                                                                                                         |           |        |          |                                      |             |         |           | Selectivity 98.8                                   |                           |                               |          |                                                                                                                                                                                                                                                                                                                                                                         |          |                |              |                               |          |  |
| $RME = \frac{\text{mass of isolated product}}{\text{total mass of reactants}} \times 100$               |           |        |          |                                      |             |         |           | AE 99.0                                            |                           |                               |          |                                                                                                                                                                                                                                                                                                                                                                         |          |                |              |                               |          |  |
|                                                                                                         |           |        |          |                                      |             |         |           | RME 97.8                                           |                           |                               |          |                                                                                                                                                                                                                                                                                                                                                                         |          |                |              |                               |          |  |
| Solvents (Zero Pass)                                                                                    |           |        |          |                                      |             |         |           |                                                    |                           |                               |          |                                                                                                                                                                                                                                                                                                                                                                         |          |                |              |                               |          |  |
| Highly hazardous solvents (Red flag for any of the following)                                           |           |        |          |                                      |             |         |           | List Highly Hazardous Solvents Below               |                           |                               |          |                                                                                                                                                                                                                                                                                                                                                                         |          |                |              |                               |          |  |
| Et <sub>2</sub> O, Benzene, CCl <sub>4</sub> , chloroform, DCE, nitromethane, CS <sub>2</sub> , HMPA    |           |        |          |                                      |             |         |           | None                                               |                           |                               |          |                                                                                                                                                                                                                                                                                                                                                                         |          |                |              |                               |          |  |
| Health and Safety (Zero Pass)                                                                           |           |        |          |                                      |             |         |           |                                                    |                           |                               |          |                                                                                                                                                                                                                                                                                                                                                                         |          |                |              |                               |          |  |
| Health & safety (Red flag for any of the following)                                                     |           |        |          |                                      |             |         |           | List substances plus the red flagged H-codes below |                           |                               |          |                                                                                                                                                                                                                                                                                                                                                                         |          |                |              |                               |          |  |
| Highly explosive                                                                                        |           |        |          | H200, H201, H202, H203               |             |         |           | None                                               |                           |                               |          |                                                                                                                                                                                                                                                                                                                                                                         |          |                |              |                               |          |  |
| Explosive thermal runaway                                                                               |           |        |          | H240                                 |             |         |           | None                                               |                           |                               |          |                                                                                                                                                                                                                                                                                                                                                                         |          |                |              |                               |          |  |
| Fatally toxic                                                                                           |           |        |          | H300, H310, H330                     |             |         |           | None                                               |                           |                               |          |                                                                                                                                                                                                                                                                                                                                                                         |          |                |              |                               |          |  |
| Mutagenic                                                                                               |           |        |          | H350                                 |             |         |           | None                                               |                           |                               |          |                                                                                                                                                                                                                                                                                                                                                                         |          |                |              |                               |          |  |
| Repro-toxic                                                                                             |           |        |          | H360                                 |             |         |           | None                                               |                           |                               |          |                                                                                                                                                                                                                                                                                                                                                                         |          |                |              |                               |          |  |
| Serious environmental implications                                                                      |           |        |          | H420                                 |             |         |           | None                                               |                           |                               |          |                                                                                                                                                                                                                                                                                                                                                                         |          |                |              |                               |          |  |
|                                                                                                         |           |        |          |                                      |             |         |           |                                                    |                           |                               |          | <div>Instructions for use: Enter your data into the tables above to automatically calculate yield, AE and RME. Use the blank boxes in the tables to enter experimental data and note the flags for each Key Parameter.<br/>Printing tips: This spreadsheet is designed to be printed with 'landscape', 'narrow margin' and 'fit all columns on one page' settings</div> |          |                |              |                               |          |  |

Fig. S36. This work: Zero Pass CHEM21 green metrics toolkit.

**Fig. S36.** This work: Zero Pass CHEM21 green metrics toolkit.



## 9. Reference

1. A. R. Shelte, R. D. Patil, S. Karan, G. R. Bhadu and S. Pratihari, *ACS Appl. Mater. Interfaces*, 2023, **15**, 24329-24345.
2. A. R. Shelte, R. N. Khatal and S. Pratihari, *Appl. Catal.*, 2023, **666**, 119417.
